## **Irradiated mesenchymal stromal cells induce genetic instability in human CD34+ cells**

Vanessa Kohl<sup>1</sup>, Oliver Drews<sup>2</sup>, Victor Costina<sup>2</sup>, Miriam Bierbaum<sup>3</sup>, Ahmed Jawhar<sup>4</sup>, Henning Roehl<sup>5</sup>, Christel Weiss<sup>6</sup>, Susanne Brendel<sup>1</sup>, Helga Kleiner<sup>1</sup>, Johanna Flach<sup>1</sup>, Birgit Spiess<sup>1</sup>, Wolfgang Seifarth<sup>1</sup>, Daniel Nowak<sup>1</sup>, Wolf-Karsten Hofmann<sup>1</sup>, Alice Fabarius<sup>1</sup> & Henning D. Popp<sup>1</sup>

<sup>1</sup> Department of Hematology and Oncology, Medical Faculty Mannheim, Heidelberg University, Mannheim, Germany

<sup>2</sup> Department of Clinical Chemistry, University Medical Center Mannheim, Mannheim, Germany

<sup>3</sup> Department of Radiation Oncology, Medical Faculty Mannheim, Heidelberg University, Mannheim, Germany

<sup>4</sup> Department of Orthopedics and Trauma Surgery, Medical Faculty Mannheim, Heidelberg University, Mannheim, Germany

<sup>5</sup> Diakonissen Hospital, Mannheim, Germany

<sup>6</sup> Department of Medical Statistics and Biomathematics, Medical Faculty Mannheim, Heidelberg University, Mannheim, Germany

These authors contributed equally: Vanessa Kohl, Oliver Drews

**Corresponding author:** Dr. Henning D. Popp (MD)

Department of Hematology and Oncology

Medical Faculty Mannheim, Heidelberg University

Theodor-Kutzer-Ufer 1-3, 68167 Mannheim, Germany

Phone: +49 621 383-71307; Fax: +49 621 383-71329

E-mail: [henning.popp@medma.uni-heidelberg.de](mailto:henning.popp@medma.uni-heidelberg.de)

### **Keywords:**

irradiation, mesenchymal stromal cells, genotoxic signaling, CD34+ cells, genetic instability, myeloid neoplasms

**Abstract:** 170 words

**Text:** 4,013 words

**Figures:** 5

**Tables:** 2

## **Abstract**

Radiation-induced bystander effects (RIBE) in human hematopoietic stem and progenitor cells may initiate myeloid neoplasms (MN). Here, the occurrence of RIBE caused by genotoxic signaling from irradiated human mesenchymal stromal cells (MSC) on human bone marrow CD34+ cells was investigated. For this purpose, healthy MSC were irradiated in order to generate conditioned medium containing potential genotoxic signaling factors. Afterwards, healthy CD34+ cells from the same donors were grown in conditioned medium and RIBE were analyzed. Increased DNA damage and chromosomal instability were detected in CD34+ cells grown in MSC conditioned medium when compared to CD34+ cells grown in control medium. Furthermore, reactive oxygen species and distinct proteome alterations, e.g., heat-shock protein GRP78, that might be secreted into the extracellular medium, were identified as potential RIBE mediators. In summary, our data provide evidence that irradiated MSC induce genetic instability in human CD34+ cells potentially resulting in the initiation of MN. Furthermore, the identification of key bystander signals, such as GRP78, may lay the framework for the development of next-generation anti-leukemic drugs.

## Introduction

Radiation therapy for neoplastic or non-neoplastic disorders may induce myeloid neoplasms (MN) in humans which are referred to as therapy-related myeloid neoplasms (t-MN) [1]. t-MN comprise the therapy-related cases of acute myeloid leukemia (t-AML), myelodysplastic syndromes (t-MDS) and myelodysplastic/myeloproliferative neoplasms (t-MDS/MPN) [1]. t-MN show genetic similarity to other high-risk MN [2, 3] and are associated with poor prognosis [4, 5]. Risk factors for the development of t-MN may include (a) inherited germline mutations in cancer susceptibility genes (e.g., *BRCA1*<sup>wt/mut</sup>), (b) acquired DNA damage in hematopoietic stem and progenitor cells (HSPC), (c) selection of pre-existing mutated hematopoietic clones (e.g., *TP53*<sup>wt/mut</sup>) and (d) alterations in the bone marrow stromal niche [6].

Irradiation may damage DNA directly in HSPC by interaction with DNA or indirectly by generation of free radicals [7]. In addition, irradiated mesenchymal stromal cells (MSC) may initiate radiation-induced bystander effects (RIBE) in HSPC potentially causing the development of t-MN [8, 9]. More precisely, RIBE describe 'out of field' effects of irradiation in non-irradiated cells which are mediated by genotoxic signaling factors released from nearby or distant irradiated cells [10]. RIBE may emerge as DNA damage (e.g., gene mutations, chromosomal aberrations, micronuclei, increased  $\gamma$ H2AX foci), cell death (e.g., apoptosis, necrosis) and induction of cell survival mechanisms (e.g., adaptive response, DNA repair) [11-14]. Genotoxic signals, which mediate RIBE, are assumed to be initiated in irradiated cells by calcium fluxes [15] and mitochondrial metabolites [16-18]. Consecutively, signal transmission between irradiated and non-irradiated cells may occur by small molecules like nitric oxide (NO) [19], reactive oxygen species (ROS) [20], nuclear factor-kappa B (NF-kappa B) [18], and transforming growth factor beta-1 (TGFbeta-1) [21, 22], that pass through cell membranes and gap junctions [23, 24]. Finally, ROS generated by NADH oxidases [25] and unknown RIBE mediators may be induced in nearby or distant non-irradiated cells. RIBE have been studied so far in normal cells, cancer cells and in several *in vivo* model systems [9, 26-30]. While RIBE have been demonstrated in mouse HSPC [8, 9], RIBE have not been detected in primary human HSPC yet [31].

In summary, RIBE might be mediated in HSPC by genotoxic signaling from irradiated MSC and may account for a major pathomechanism in the initiation of certain MN. In contrast, the occurrence of RIBE in human HSPC has never been verified and genotoxic signaling factors are unknown yet. Therefore, our study was designed to analyze RIBE in CD34+ myeloid progenitor cells by immunofluorescence microscopy of  $\gamma$ H2AX (as a readout of DNA damage), by analysis of G-banded chromosomes (for detection of chromosomal instability (CIN)) and by luminescence plate reading of cell viability. Furthermore, ROS and proteome alterations were assessed in irradiated MSC, MSC conditioned medium and CD34+ cells

grown in MSC conditioned medium for the identification of potential genotoxic signaling factors.

## **Materials and methods**

### **Femoral head preparation**

This study was approved by the Ethics Committee II, Medical Faculty Mannheim, Heidelberg University. Procedures were performed in accordance with the local ethical standards and the principles of the 1964 Helsinki Declaration and its later amendments. Written informed consent was obtained from all study participants. Femoral heads of 12 patients with coxarthrosis (7 females, 5 males, mean age: 69 years) undergoing endoprothetic surgery were collected (Table 1). The bones were broken into fragments and incubated for 1 hour at 37 °C in phosphate-buffered saline (PBS) supplemented with 1 mg/ml collagenase type I (Thermo Fisher, Waltham, US). The supernatants were filtered through 100 µm pores of a cell strainer (Greiner Bio-One, Kremsmünster, Austria). MSC were grown from the fragments retained in the cell strainers in serum-free StemMACS MSC Expansion Media XF (Miltenyi Biotec, Bergisch Gladbach, Germany) supplemented with 1% penicillin/streptomycin. Adherent MSC were expanded in T175 flasks in a humidified 5% CO<sub>2</sub> atmosphere at 37 °C and passaged at 80% confluency. Furthermore, CD34+ cells were enriched from the filtrates by Ficoll density gradient centrifugation and magnetic-activated cell sorting using CD34 antibody-conjugated microbeads (Miltenyi Biotec). CD34+ cells were grown in serum-free StemSpan SFEMII (Stemcell Technologies, Vancouver, Canada) supplemented with StemSpan Myeloid Expansion supplement (SCF, TPO, G-CSF, GM-CSF) (Stemcell Technologies) and 1% penicillin/streptomycin in a humidified 5% CO<sub>2</sub> atmosphere at 37 °C.

### **Preparation of MSC conditioned medium**

MSC were grown in T175 flasks until reaching 80% confluency. MSC were rinsed in PBS before fresh serum-free StemSpan SFEMII was added. Afterwards, MSC were irradiated with 2 Gy of 6 MV x-rays in a Versa HD linear accelerator (Elekta, Stockholm, Sweden), while control MSC were not irradiated. Medium was conditioned by the irradiated and non-irradiated MSC for a period of 4 h incubation at 37 °C to generate MSC conditioned medium and control medium, respectively. The media were centrifuged at 1,200 rpm for 10 min, and supernatants were stored at – 20 °C.

### **RIBE analyses**

RIBE were analyzed in CD34+ cells at day 6 after culture for 3 days in untreated medium followed by culture for 3 days in conditioned medium or control medium, respectively. Immunofluorescence staining of the DNA double-strand-break marker γH2AX [32] was

performed using a JBW301 mouse monoclonal anti- $\gamma$ H2AX antibody (Merck, Darmstadt, Germany) and an Alexa Fluor 488-conjugated goat anti-mouse secondary antibody (Thermo Fisher) [33, 34]. At least 50 nuclei were evaluated in each analysis. Cytogenetic analysis of G-banded chromosomes was performed according to standard procedures [35]. At least 25 metaphases were analyzed in each sample according to ISCN 2016 [36]. Cell viability was assessed using the CellTiter-Glo luminescent cell viability assay (Promega, Fitchburg, US) according to the manufacturer's instructions. Luminescence was measured using a microplate reader (Tecan, Männedorf, Switzerland). ROS were analyzed using the ROS Detection Kit (PromoCell, Heidelberg, Germany) according to the manufacturer's instructions. Luminescence was measured using a microplate reader (Tecan).

### **Protein quantitation using mass spectrometry**

A proteomics approach for label-free quantitation using nanoscale liquid chromatography coupled to tandem mass spectrometry (nano LC-MS/MS) was applied for comparison of proteome differences.

### **Sample preparation for proteome analysis**

Samples were prepared from 2 Gy irradiated MSC 4 h after irradiation and from non-irradiated control MSC. All MSC of 80% confluent T175 flasks were collected and washed three times in PBS. Afterwards, MSC were lysed in 200  $\mu$ l RIPA buffer supplemented with Halt Protease Inhibitor Cocktail (100X) (Thermo Fisher) on ice for 30 min. Further, MSC conditioned medium and control medium were prepared using serum-free StemMACS MSC Expansion Media XF as stated before. Finally, samples from CD34<sup>+</sup> cells were prepared at day 6 after culture for 3 days in untreated medium followed by culture for 3 days in conditioned medium or control medium, respectively. After washing the samples three times in PBS, 1x10<sup>6</sup> CD34<sup>+</sup> cells of each sample were lysed in 200  $\mu$ l RIPA buffer supplemented with Halt Protease Inhibitor Cocktail (100X) on ice for 30 min. Lysates were stored at - 20 °C.

### **Sample fractionation by SDS-PAGE and in-gel digestion**

Cell culture supernatants were concentrated tenfold before SDS polyacrylamide gel electrophoresis (SDS-PAGE) by ultrafiltration (MWCO 5 kDa). Samples were heated to 95 °C for 5 min and cooled on ice prior to loading on NuPAGE 4-12% Bis-Tris gels (Thermo Fisher). SDS-PAGE was performed of all compared samples in parallel according to the manufacturer's specification. Proteins were fixed within the polyacrylamide matrix by incubating the entire gel in 5% acetic acid in 1:1 (vol/vol) water:methanol for 30 min. After Coomassie staining (60 min) the gel slab was rinsed with water for 60 min. Each lane was

excised and subdivided in three fractions according to protein complexity over standardized molecular weight ranges. Gel fractions were cut into small pieces. Subsequently, proteins were destained by 100 mM ammonium bicarbonate/acetonitrile 1:1 (vol/vol) before reduction for 30 min in 10 mM DTT and alkylation for 30 min in 50 mM iodoacetamide. Finally, proteins were digested by trypsin overnight at 37 °C. Peptides were collected from supernatant and extracted additionally from gel pieces by 1.5% formic acid in 66% acetonitrile for 15 min. Peptides from both steps were combined and dried down in a vacuum centrifuge.

### **Mass spectrometry**

Fractions of dried peptides were re-dissolved in 35 µl 0.1% trifluoroacetic acid and analyzed individually. For this, peptides were loaded on a 75 µm x 2 cm Acclaim C18 precolumn (Thermo Fisher) using an RSLCnano HPLC system (Thermo Fisher). Then, peptides were eluted with an aqueous-organic gradient (4-44% acetonitrile, 0.1% formic acid) for 130 min and separated on a 75 µm x 15 cm Acclaim C18 column (Thermo Fisher) with a flow rate of 300 nl/min. A Triversa Automate (Advion, Ithaca, US) was used as ion source to produce a stable electrospray, which was analyzed on a LTQ Orbitrap XL mass spectrometer (Thermo Fisher). Each scan cycle consisted of one FTMS full scan and up to 10 ITMS dependent MS/MS scans of the ten most intense ions with dynamic exclusion set to 30 sec. Mass width was set to 10 ppm and monoisotopic precursor selection was enabled. All analyses were performed in positive ion mode.

### **Comparative proteome analysis**

Differences in proteomes between treatment groups were analyzed by Proteome Discoverer version 2.4 (Thermo Fisher). Comparisons were made between matching sample types and fractions. CD34+ cells and MSC analyses were based on 5 replicates. For the comparison of protein supplement-free cell culture supernatants, 4 replicates were utilized. The analyses were based on at least 10 ppm mass accuracy and 1% false discovery rate. Peptides were identified using the SEQUEST algorithm and a human proteome database retrieved from UniProt (Aug. 2019, <https://www.uniprot.org>). Protein abundance was calculated based on intensities of unique precursor ions and limited to unmodified peptides with high confidence. Precursor ion intensities were normalized to the total peptide amount in each sample. Protein abundance ratios derived from irradiated vs. non-irradiated cell samples were calculated as median of pairwise precursor comparison of replicates to reflect the pairwise experimental design of treatments. Missing intensities were imputed based on replicates, and statistics were calculated by background based ANOVA. In cell culture supernatants, the number of required background elements was insufficient for background based ANOVA. Therefore, t-tests were calculated for individual proteins. Furthermore, differences in cell culture

supernatant were based on the top three scored unique peptides to account for protein processing, such as signal peptide truncation, etc.. All protein identifications were filtered for a required minimum of at least two unique peptides. A minimum of two distinct peptides with similar regulation was utilized as a requirement for calculated ratios during manual inspection. In addition, a minimum detection in at least three replicates was an essential inclusion criterion for calculated ratios during manual inspection. Tables summarizing differences in proteomes between treatment groups meet all criteria described above and include corresponding *p* values.

### **Statistical analysis**

Proteomic data were analyzed as outlined in the section above. All other statistical calculations were done with SAS software, release 9.4 (SAS Institute, Cary, US). For comparisons between treated groups and controls, Wilcoxon two-sample tests were used. One sample t-tests were used in order to investigate if mean fold changes (fc) were different from 1.

## Results

### Validation of cell-free MSC conditioned medium

To ensure that MSC conditioned medium was cell-free in our experiments only centrifuged supernatants of MSC conditioned medium were used. In addition, (a) microscopic evaluation of supernatants in a Neubauer counting chamber, (b) control experiments ( $n = 3$ ) with sterile filtered supernatants and (c) cytogenetic cross-over experiments ( $n = 2$ ) using sexually divergent CD34+ cells and MSC were performed, which demonstrated no transfer of MSC in our experiments.

### ROS in MSC and CD34+ cells

ROS were analyzed in 2 Gy irradiated MSC samples ( $n = 8$ ) at 4 h after irradiation and in non-irradiated control MSC. Increased ROS levels ( $p = 0.0105$ ) were detected in irradiated MSC ( $fc = 1.8 \pm 0.2$ ; mean  $\pm$  standard error of mean (SEM)) when compared to non-irradiated MSC ( $fc = 1$ ) (Fig. 1a). Furthermore, ROS were analyzed in CD34+ cell samples ( $n = 5$ ) expanded for 3 days in untreated medium followed by culture for 3 days in conditioned medium or control medium, respectively. ROS levels tended to be increased ( $p = 0.2206$ ) in CD34+ cells grown in conditioned medium ( $fc = 1.2 \pm 0.2$ ) when compared to ROS levels in CD34+ cells grown in control medium ( $fc = 1$ ) (Fig. 1b).

### DNA damage in CD34+ cells

$\gamma$ H2AX foci were analyzed in CD34+ cell samples ( $n = 9$ ) expanded for 3 days in untreated medium followed by culture for 3 days in conditioned medium or control medium, respectively.  $\gamma$ H2AX foci levels were increased ( $p = 0.0003$ ) in CD34+ cells grown in conditioned medium ( $2.8 \pm 0.5$   $\gamma$ H2AX foci per CD34+ cell; mean  $\pm$  SEM) when compared to  $\gamma$ H2AX foci levels in CD34+ cells grown in control medium ( $0.5 \pm 0.1$   $\gamma$ H2AX foci per CD34+ cell) (Fig. 2a, b).

### Chromosomal instability in CD34+ cells

Metaphases were analyzed in CD34+ cell samples ( $n = 12$ ) expanded for 3 days in untreated medium followed by culture for 3 days in conditioned medium or control medium, respectively (Fig. 2c-e, Table 1). Structural and numerical chromosomal aberrations were detected in



50% and 92% of CD34+ cell samples grown in MSC conditioned medium, respectively, when compared to normal karyotypes detected in CD34+ cell samples grown in control medium. In particular, chromatid breaks (ctb), e.g., ctb(5q), ctb(6p), ctb(7q), ctb(10q), ctb(11q) and ctb(13q), translocations, e.g., der(1)t(1;7) and aneuploidies, e.g., tetraploidies and octoploidies, were observed in CD34+ cells grown in conditioned medium. Finally, the estimated mitotic rates as determined by the number of dividing cells among all cells were similar in CD34+ cells grown in conditioned medium and in CD34+ cells grown in control medium.

### **Viability of CD34+ cells**

Viability was assessed in CD34+ cell samples (n = 10) grown for 3 days in untreated medium followed by culture for 3 days in conditioned medium or control medium, respectively. Viability of CD34+ cells grown in conditioned medium (fc = 1.1 ± 0.1; mean ± SEM) was similar when compared to viability of CD34+ cells grown in control medium (fc = 1; data not shown).

### **Proteome analysis in MSC, MSC conditioned medium and CD34+ cells**

Comparative proteome analysis was performed in patient samples with (a) lysates of irradiated and non-irradiated MSC, (b) MSC conditioned and control medium and (c) lysates of CD34+ cells grown in conditioned and control medium (Figs. 3, 4, Table 2). In MSC, 31 of 1924 identified proteins (1.6%) were regulated at least twofold within 4 hours upon a single irradiation dose of 2 Gy compared to controls. The majority was upregulated (94%) and about half participate in translation, protein folding as well as protein degradation. Six altered proteins are part of the cytoskeleton and participate in its dynamic regulation. Four are members of nuclear transport mechanisms and the nuclear pore complex. The remaining participate in energy metabolism (e.g., glycolysis), oxidative stress detoxification, cell-cell/matrix interaction and transmembrane signaling.

In the corresponding conditioned medium of MSC, 4 of 265 identified proteins (1.5%) were found increased in their abundance by factor 2 or higher 4 h after irradiation vs. controls. Remarkably, three of these proteins are key proteins in the endoplasmic reticulum (ER) and known for their role in protein folding as well as protein quality control. Besides one upregulated member of the glycolysis, no other proteins were differentially abundant in conditioned medium.

Exposure of CD34+ cells to the conditioned medium of irradiated MSC for three days induced quantitative changes of a minimum factor 2 in 5 of 2003 identified proteins (0.25%). Similar to MSC, affected proteins participate in translation, protein degradation and cytoskeleton dynamics. Notably, eIF3f was lower abundant in CD34+ cells, whereas it was

higher abundant in MSC in conjunction with irradiation. Unique to the response in CD34+ cells were changes in proteins participating in transcriptional regulation/chromatin remodeling and ERBB3 regulation. Overall, the response in CD34+ cells to conditioned medium affected much less proteins than in MSC, which were directly exposed to irradiation.

## Discussion

The aim of our study was to analyze genetic alterations induced by DNA damage signaling from irradiated MSC to human CD34+ cells as a potential mechanism of MN initiation. For this purpose, RIBE were analyzed in human CD34+ cells grown in medium conditioned by 2 Gy irradiated human MSC. Notably, increased numbers of  $\gamma$ H2AX foci as well as structural and numerical chromosomal aberrations were detected in CD34+ cells grown in MSC conditioned medium when compared to CD34+ cells grown in control medium. The increased numbers of  $\gamma$ H2AX foci in CD34+ cells grown in MSC conditioned medium may not only indicate critical DNA damage potentially contributing to MN initiation, e.g., by activation of oncogenes or inactivation of tumor suppressor genes [37]. In addition,  $\gamma$ H2AX foci may indicate DSB [32] involved in chromosomal rearrangements such as deletions, inversions and translocations. Indeed, t-MN related chromosomal aberrations were found in CD34+ cells grown in MSC conditioned medium when compared to whole chromosomes in CD34+ cells grown in control medium. Particularly, *chtb*(5q), *chtb*(7q), *chtb*(11q) and *chtb*(13q), that were found in CD34+ cells grown in MSC conditioned medium, coincided well with *del*(5q), *del*(7q), *t*(11q23.3) and *del*(13q), that are present in about 42%, 49%, 3% and < 5% of t-MN, respectively [1, 6]. In addition, t-MN related aneuploidies, e.g., tetraploidies and octoploidies, were detected in CD34+ cells grown in MSC conditioned medium. Numerical chromosomal aberrations are caused by defects in mitosis, e.g., chromosomal non-disjunction and cytokinesis failure [38]. Moreover, tetraploidies are hallmark precursor lesions in diverse cancers, e.g., cervical cancer and neuroblastoma and occur in about 1% of AML but 13% of t-AML cases [38, 39]. As tetraploid cells harbor 4n centrosomes, multipolar spindles may form potentially driving a CIN phenotype. With ongoing dedifferentiation of CD34+ cells CIN may further aggravate in the course of disease evolution, e.g., by frequent inactivation of *TP53*, which may result in rapid t-MN development [38]. Finally, the increased numbers of  $\gamma$ H2AX foci and chromosomal aberrations did not seem to affect overall viability of CD34+ cells within the observation period as viability was similar in CD34+ cells grown in conditioned medium and in CD34+ cells grown in control medium.

ROS were analyzed in irradiated MSC and CD34+ cells grown in MSC conditioned medium for their potential contribution to bystander signaling from irradiated MSC to CD34+ cells.

Increased ROS levels were detected in irradiated MSC and in CD34+ cells grown in MSC conditioned medium. While ROS are known genotoxic molecules generated by endogenous and exogenous sources in each cell, ROS may also function as important regulators of intracellular signaling pathways, e.g., by covalent modification of specific cysteine residues in redox-sensitive target proteins [40]. Oxidation of specific cysteine residues in turn can lead to reversible modification of enzyme activity [40] with effects on diverse pathways including metabolism, differentiation and proliferation [41]. Hence, ROS may not only induce DNA damage but also dysregulate cellular pathways, thereby contributing to oncogenic transformation of CD34+ cells.

In order to identify potential mediators for the observed oncogenic transformation in CD34+ cells as well as mechanisms leading to their release in MSC and transduction in CD34+ cells, comparative proteome analyses were performed in three tiers of (a) irradiated MSC, (b) MSC conditioned medium and (c) CD34+ cells grown in MSC conditioned medium. Among these three comparisons, irradiated MSC showed the largest change in proteome, which is in accordance with the impact of the primary stimulus. Still, the response can be regarded as rather moderate, because only 1.6% of the analyzed proteome was altered by a factor 2 or higher. An underlying mechanism might be the relative radioresistance of MSC [42]. The majority of altered proteins in response to irradiation take part in translation, protein folding as well as protein degradation, indicating disturbed protein homeostasis and required replacement, repair and degradation of proteins. Interestingly, three of the few quantitatively altered proteins in MSC conditioned medium upon irradiation were key ER proteins involved in protein folding and their quality control. The highest increase was observed for GRP78, an ER chaperone, which dissociates from luminal domains of IRE1, PERK and ATF6 in consequence of ER stress resulting in activation of the unfolded protein response (UPR) [43] and promotion of the ER-associated protein degradation pathway (ERAD) [44]. In turn, ERAD relies on substrate degradation via the ubiquitin-proteasome system. Notably, two proteasome activator proteins (ECM29 and PA28-gamma) as well as a key assembly factor of SCF E3 ubiquitin ligase complexes (p120 CAND1) were all increased in irradiated MSC. Altogether the results indicate that irradiation resulted in ER stress. The stress response may be induced in part by associated ROS. At proteome level, MSC responded to increased oxidative stress by elevating levels of peroxiredoxin-2 and GSTP1-1.

The perception about GRP78 has changed over the past decade, as a growing number of signaling processes become apparent, which are not related to its canonical role in the ER [45, 46]. It appears that GRP78 is not exclusively present in the ER but can be relocated to the cell surface (csGRP78) or even secreted into the extracellular medium (sGRP78). Both have been described to confer critical roles in the context of cancer development and cell survival [45, 46]. For example, sGRP78 can act as a pro-apoptotic ligand of csGRP78 on

pancreatic  $\beta$ -cells [47], but as a mediator of pro-survival kinase signaling in endothelial cells [48]. In addition, csGRP78 plays a mechanistic role in PI3K/AKT driven leukemogenesis [49] and in Cripto/csGRP78 regulated hematopoietic stem cell survival [50]. Therefore, monitoring of sGRP78 and targeting of csGRP78 is evaluated in anti-cancer therapy [45, 46]. Considering these emerging roles of GRP78, non-canonical csGRP78 signaling may impact the survival of CD34+ cells harboring genetic aberrations and contribute to oncogenic bystander signaling. The remaining two ER proteins with increased abundance upon irradiation in MSC conditioned medium were PDIA3 and calreticulin. PDIA3 catalyzes the rearrangement of disulfide bonds [51] and thereby enables correct folding of newly-synthesized glyco-proteins [52]. In addition, it interacts with the ER resident calcium binding lectins calreticulin and calnexin. Similar to the function of proteins altered in response to irradiation in MSC, calreticulin and calnexin participate in protein quality control and folding, more specifically, in a process known as the calreticulin/calnexin cycle [53]. The fact that three ER proteins with related function were specifically increased in the conditioned medium upon MSC irradiation, while the vast majority of other cytosolic and ER proteins were unaffected, suggests a specific release rather than uncontrolled cell lysis or unspecific cellular loss of the ER.

In CD34+ cells, the conditioned medium from irradiated MSC induced only minute detectable changes at proteome level after three days of exposure. Individual proteins participating in degradation, translation and cytoskeleton dynamics represent similar processes affected in MSC. Unique to CD34+ cells were proteins participating in chromatin remodeling (HMGB1) and ERBB3 signaling (EBP1). In particular EBP1 has oncogenic potential [54] and is highly expressed in AML cells [55], but HMGB1 assumes a number of roles in cancer development as well [56]. In addition, IQGAP1 can promote malign development [57]. As a consequence, several modes of action, which work individually or in conjunction, may transduce radiation-induced bystander signaling in effector cells.

Our data describe a sequence of cellular events from the primary response of irradiated MSC, over transmission of genotoxic signals in conditioned medium to the induction of mechanisms leading to critical DNA damage and CIN in CD34+ cells (Fig. 5). Ultimately, such genetic aberrations in effector cells have the potential for MN development. The results provide a fundamental basis for in-depth mechanistic research and novel therapeutic interventions to reduce the risk of t-MN development. Accordingly, antioxidants, such as N-acetylcysteine, might be able to counteract ROS in MSC and HSPC, thereby diminishing the risk for t-MN after irradiation. In addition, monoclonal antibodies (e.g., MAb159) [58] and peptidomimetics (e.g., BMTP-78) [59] targeting non-canonical csGRP78 signaling hold the potential to reduce the risk of t-MN.

In conclusion, genotoxic signaling by irradiated MSC emerges as a major pathomechanism in the initiation of certain MN offering the opportunity to take advantage of targeted therapeutic interventions. Specifically, our data suggest that bystander signals released by irradiated MSC, such as GRP78, are potential mediators of DNA damage and CIN in CD34+ cells, thereby providing a strong mechanistic link to the initiation of MN. More work is necessary to dissect the signaling pathways behind such oncogenic mediators which may define the targets of next-generation anti-leukemic drugs.

### **Data availability**

Primary proteomic data are available from the corresponding author upon request.

### **Acknowledgements**

HDP and AF received grants from Deutsche José Carreras Leukämie-Stiftung (DJCLS 14 R/2017). DN is an endowed Professor of the same foundation (DJCLS H 03/01).

### **Author contributions**

VK performed RIBE analysis, OD contributed proteomic expertise, VC conducted mass spectrometry, MB and HK irradiated MSC, AJ and HR supported femoral head collection, CW performed statistical analysis, SB supported RIBE analysis, JF, BS, WS, DN and WKH provided expertise, AF contributed cytogenetic expertise, HDP designed the study and wrote the manuscript.

### **Conflict of interest**

The authors declare that they have no conflict of interest.

### **References**

1. Vardiman JW, Arber DA, Brunning RD, Larson RA, Matutes E, Baumann I, Kvasnicka HM. Therapy-related myeloid neoplasms. In: Swerdlow SH, Campo E, Harris LE, Jaffe ES, Pileri SA, Stein H, Thiele J, Arber DA, Hasserjian RP, Le Beau MM, Orazi A, Siebert R (eds). WHO Classification of Tumours of Haematopoietic and Lymphoid Tissues. 4th edn. (IARC, Lyon, 2017) pp 153-155.
2. Ok CY, Patel KP, Garcia-Manero G, Routbort MJ, Fu B, Tang G, et al. Mutational profiling of therapy-related myelodysplastic syndromes and acute myeloid leukemia by next generation sequencing, a comparison with de novo diseases. *Leuk Res* 2015;39:348-354.
3. Wong TN, Ramsingh G, Young AL, Miller CA, Touma W, Welch JS, et al. Role of TP53 mutations in the origin and evolution of therapy-related acute myeloid leukaemia. *Nature* 2015;518:552-555.
4. Fianchi L, Pagano L, Piciocchi A, Candoni A, Gaidano G, Breccia M, et al. Characteristics and outcome of therapy-related myeloid neoplasms: Report from the Italian network on secondary leukemias. *Am J Hematol* 2015;90:E80-85.

5. Granfeldt Ostgard LS, Medeiros BC, Sengelov H, Norgaard M, Andersen MK, Dufva IH, et al. Epidemiology and Clinical Significance of Secondary and Therapy-Related Acute Myeloid Leukemia: A National Population-Based Cohort Study. *J Clin Oncol* 2015;33:3641-3649.
6. McNerney ME, Godley LA, Le Beau MM. Therapy-related myeloid neoplasms: when genetics and environment collide. *Nat Rev Cancer* 2017;17:513-527.
7. Dizdaroglu M, Jaruga P. Mechanisms of free radical-induced damage to DNA. *Free Radic Res* 2012;46:382-419.
8. Lorimore SA, McIlrath JM, Coates PJ, Wright EG. Chromosomal instability in unirradiated hemopoietic cells resulting from a delayed in vivo bystander effect of gamma radiation. *Cancer Res* 2005;65:5668-5673.
9. Lorimore SA, Chrystal JA, Robinson JI, Coates PJ, Wright EG. Chromosomal instability in unirradiated hemaopoietic cells induced by macrophages exposed in vivo to ionizing radiation. *Cancer Res* 2008;68:8122-8126.
10. Mothersill C, Seymour CB. Radiation-induced bystander effects--implications for cancer. *Nat Rev Cancer* 2004;4:158-164.
11. Azzam EI, de Toledo SM, Raaphorst GP, Mitchel RE. Low-dose ionizing radiation decreases the frequency of neoplastic transformation to a level below the spontaneous rate in C3H 10T1/2 cells. *Radiat Res* 1996;146:369-373.
12. Watson GE, Lorimore SA, Macdonald DA, Wright EG. Chromosomal instability in unirradiated cells induced in vivo by a bystander effect of ionizing radiation. *Cancer Res* 2000;60:5608-5611.
13. Nagasawa H, Little JB. Induction of sister chromatid exchanges by extremely low doses of alpha-particles. *Cancer Res* 1992;52:6394-6396.
14. Zhou H, Randers-Pehrson G, Waldren CA, Vannais D, Hall EJ, Hei TK. Induction of a bystander mutagenic effect of alpha particles in mammalian cells. *Proc Natl Acad Sci U S A* 2000;97:2099-2104.
15. Shao C, Lyng FM, Folkard M, Prise KM. Calcium fluxes modulate the radiation-induced bystander responses in targeted glioma and fibroblast cells. *Radiat Res* 2006;166:479-487.
16. Chen S, Zhao Y, Han W, Zhao G, Zhu L, Wang J, et al. Mitochondria-dependent signalling pathway are involved in the early process of radiation-induced bystander effects. *Br J Cancer* 2008;98:1839-1844.
17. Tartier L, Gilchrist S, Burdak-Rothkamm S, Folkard M, Prise KM. Cytoplasmic irradiation induces mitochondrial-dependent 53BP1 protein relocalization in irradiated and bystander cells. *Cancer Res* 2007;67:5872-5879.
18. Zhou H, Ivanov VN, Lien YC, Davidson M, Hei TK. Mitochondrial function and nuclear factor-kappaB-mediated signaling in radiation-induced bystander effects. *Cancer Res* 2008;68:2233-2240.
19. Shao C, Stewart V, Folkard M, Michael BD, Prise KM. Nitric oxide-mediated signaling in the bystander response of individually targeted glioma cells. *Cancer Res* 2003;63:8437-8442.
20. Wang R, Coderre JA. A bystander effect in alpha-particle irradiations of human prostate tumor cells. *Radiat Res* 2005;164:711-722.
21. Shao C, Folkard M, Prise KM. Role of TGF-beta1 and nitric oxide in the bystander response of irradiated glioma cells. *Oncogene* 2008;27:434-440.
22. Gow MD, Seymour CB, Ryan LA, Mothersill CE. Induction of bystander response in human glioma cells using high-energy electrons: a role for TGF-beta1. *Radiat Res* 2010;173:769-778.
23. Shao C, Furusawa Y, Aoki M, Ando K. Role of gap junctional intercellular communication in radiation-induced bystander effects in human fibroblasts. *Radiat Res* 2003;160:318-323.
24. Azzam EI, de Toledo SM, Little JB. Direct evidence for the participation of gap junction-mediated intercellular communication in the transmission of damage signals from alpha - particle irradiated to nonirradiated cells. *Proc Natl Acad Sci U S A* 2001;98:473-478.

25. Thannickal VJ, Fanburg BL. Activation of an H<sub>2</sub>O<sub>2</sub>-generating NADH oxidase in human lung fibroblasts by transforming growth factor beta 1. *J Biol Chem* 1995;270:30334-30338.
26. Yang H, Asaad N, Held KD. Medium-mediated intercellular communication is involved in bystander responses of X-ray-irradiated normal human fibroblasts. *Oncogene* 2005;24:2096-2103.
27. Sokolov MV, Smilenov LB, Hall EJ, Panyutin IG, Bonner WM, Sedelnikova OA. Ionizing radiation induces DNA double-strand breaks in bystander primary human fibroblasts. *Oncogene* 2005;24:7257-7265.
28. Dickey JS, Baird BJ, Redon CE, Sokolov MV, Sedelnikova OA, Bonner WM. Intercellular communication of cellular stress monitored by gamma-H2AX induction. *Carcinogenesis* 2009;30:1686-1695.
29. Koturbash I, Rugo RE, Hendricks CA, Loree J, Thibault B, Kutanzi K, et al. Irradiation induces DNA damage and modulates epigenetic effectors in distant bystander tissue in vivo. *Oncogene* 2006;25:4267-4275.
30. Bertucci A, Pocock RD, Randers-Pehrson G, Brenner DJ. Microbeam irradiation of the *C. elegans* nematode. *J Radiat Res* 2009;50 Suppl A:A49-54.
31. Sokolov MV, Neumann RD. Radiation-induced bystander effects in cultured human stem cells. *PLoS One* 2010;5:e14195.
32. Mah LJ, El-Osta A, Karagiannis TC.  $\gamma$ H2AX: a sensitive molecular marker of DNA damage and repair. *Leukemia* 2010;24:679-686.
33. Popp HD, Naumann N, Brendel S, Henzler T, Weiss C, Hofmann WK, et al. Increase of DNA damage and alteration of the DNA damage response in myelodysplastic syndromes and acute myeloid leukemias. *Leuk Res* 2017;57:112-118.
34. Popp HD, Brendel S, Hofmann WK, Fabarius A. Immunofluorescence Microscopy of  $\gamma$ H2AX and 53BP1 for Analyzing the Formation and Repair of DNA Double-strand Breaks. *J Vis Exp* 2017.
35. Gisselsson D. Cytogenetic Methods. In: Heim S, Mitelman F (eds). *Cancer Cytogenetics*, 3rd edn. (Wiley-Blackwell, Hoboken, 2009) pp 9-16.
36. McGowan-Jordan J, Simons, A., Schmid, M. *ISCN 2016 An International System for Human Cytogenetic Nomenclature (2016)*. Karger: Basel, 2016.
37. American Cancer Society. *Oncogenes and tumor suppressor genes*. <https://www.cancer.org/cancer/cancer-causes/genetics/genes-and-cancer/oncogenes-tumor-suppressor-genes.html>. Accessed 20 Aug 2020.
38. Tanaka K, Goto H, Nishimura Y, Kasahara K, Mizoguchi A, Inagaki M. Tetraploidy in cancer and its possible link to aging. *Cancer Sci* 2018;109:2632-2640.
39. Huang L, Wang SA, DiNardo C, Li S, Hu S, Xu J, et al. Tetraploidy/near-tetraploidy acute myeloid leukemia. *Leuk Res* 2017;53:20-27.
40. Finkel T. Signal transduction by mitochondrial oxidants. *J Biol Chem* 2012;287:4434-4440.
41. Reczek CR, Chandel NS. ROS-dependent signal transduction. *Curr Opin Cell Biol* 2015;33:8-13.
42. Singh S, Kloss FR, Brunauer R, Schimke M, Jamnig A, Greiderer-Kleinlercher B, et al. Mesenchymal stem cells show radioresistance in vivo. *J Cell Mol Med* 2012;16:877-887.
43. Hetz C, Zhang K, Kaufman RJ. Mechanisms, regulation and functions of the unfolded protein response. *Nat Rev Mol Cell Biol* 2020.
44. Meusser B, Hirsch C, Jarosch E, Sommer T. ERAD: the long road to destruction. *Nat Cell Biol* 2005;7:766-772.
45. Ni M, Zhang Y, Lee AS. Beyond the endoplasmic reticulum: atypical GRP78 in cell viability, signalling and therapeutic targeting. *Biochem J* 2011;434:181-188.
46. Ge R, Kao C. Cell Surface GRP78 as a Death Receptor and an Anticancer Drug Target. *Cancers (Basel)* 2019;11.
47. Vig S, Buitinga M, Rondas D, Crevecoeur I, van Zandvoort M, Waelkens E, et al. Cytokine-induced translocation of GRP78 to the plasma membrane triggers a pro-apoptotic feedback loop in pancreatic beta cells. *Cell Death Dis* 2019;10:309.

48. Kern J, Untergasser G, Zenzmaier C, Sarg B, Gastl G, Gunsilius E, et al. GRP-78 secreted by tumor cells blocks the antiangiogenic activity of bortezomib. *Blood* 2009;114:3960-3967.
49. Wey S, Luo B, Tseng CC, Ni M, Zhou H, Fu Y, et al. Inducible knockout of GRP78/BiP in the hematopoietic system suppresses Pten-null leukemogenesis and AKT oncogenic signaling. *Blood* 2012;119:817-825.
50. Miharada K, Karlsson G, Rehn M, Rorby E, Siva K, Cammenga J, et al. Cripto regulates hematopoietic stem cells as a hypoxic-niche-related factor through cell surface receptor GRP78. *Cell Stem Cell* 2011;9:330-344.
51. Bourdi M, Demady D, Martin JL, Jabbour SK, Martin BM, George JW, et al. cDNA cloning and baculovirus expression of the human liver endoplasmic reticulum P58: characterization as a protein disulfide isomerase isoform, but not as a protease or a carnitine acyltransferase. *Arch Biochem Biophys* 1995;323:397-403.
52. Oliver JD, van der Wal FJ, Bulleid NJ, High S. Interaction of the thiol-dependent reductase ERp57 with nascent glycoproteins. *Science* 1997;275:86-88.
53. Caramelo JJ, Parodi AJ. Getting in and out from calnexin/calreticulin cycles. *J Biol Chem* 2008;283:10221-10225.
54. Gala K, Chandarlapaty S. Molecular pathways: HER3 targeted therapy. *Clin Cancer Res* 2014;20:1410-1416.
55. Nguyen le XT, Zhu L, Lee Y, Ta L, Mitchell BS. Expression and Role of the ErbB3-Binding Protein 1 in Acute Myelogenous Leukemic Cells. *Clin Cancer Res* 2016;22:3320-3327.
56. Kang R, Zhang Q, Zeh HJ, 3rd, Lotze MT, Tang D. HMGB1 in cancer: good, bad, or both? *Clin Cancer Res* 2013;19:4046-4057.
57. Johnson M, Sharma M, Henderson BR. IQGAP1 regulation and roles in cancer. *Cell Signal* 2009;21:1471-1478.
58. Liu R, Li X, Gao W, Zhou Y, Wey S, Mitra SK, et al. Monoclonal antibody against cell surface GRP78 as a novel agent in suppressing PI3K/AKT signaling, tumor growth, and metastasis. *Clin Cancer Res* 2013;19:6802-6811.
59. Staquicini DI, D'Angelo S, Ferrara F, Karjalainen K, Sharma G, Smith TL, et al. Therapeutic targeting of membrane-associated GRP78 in leukemia and lymphoma: preclinical efficacy in vitro and formal toxicity study of BMTP-78 in rodents and primates. *Pharmacogenomics J* 2018;18:436-443.



## Figure legends

**Fig. 1 Reactive oxygen species (ROS) levels in irradiated mesenchymal stromal cells (MSC) and CD34+ cells grown in MSC conditioned medium.** **a** ROS levels in 2 Gy irradiated MSC at 4 h after irradiation. \* $p = 0.0105$ . **b** ROS levels in CD34+ cells grown for 3 days in medium conditioned by 2 Gy irradiated MSC. \*\* $p = 0.2206$ . *fc* fold change.

**Fig. 2 Radiation-induced bystander effects in CD34+ cells.** **a** Exemplary immunofluorescence images of  $\gamma$ H2AX foci (green, Alexa 488) in nuclei (blue, DAPI) of CD34+ cells grown for 3 days in medium conditioned by 2 Gy irradiated mesenchymal stromal cells (MSC). **b** The numbers of  $\gamma$ H2AX foci were increased in CD34+ cells grown for 3 days in medium conditioned by 2 Gy irradiated MSC when compared to the numbers of  $\gamma$ H2AX foci in CD34+ cells grown in control medium. \* $p = 0.0003$ . **c-d** Exemplary aberrant metaphases of different donor CD34+ cells grown for 3 days in MSC conditioned medium. **e** Exemplary aberrant karyotype of a donor CD34+ cell grown for 3 days in MSC conditioned medium.

**Fig. 3 SDS-PAGE.** **a** Lysates of irradiated and non-irradiated MSC, **b** MSC conditioned and control medium and **c** lysates of CD34+ cells grown in conditioned and control medium.

**Fig. 4 Proteome alterations according to categories in mesenchymal stromal cells (MSC), MSC conditioned medium and CD34+ cells.** **a** Proteome shifts in irradiated MSC. \* 3%. **b** Proteome shifts in MSC conditioned medium. **c** Proteome shifts in CD34+ cells grown for 3 days in MSC conditioned medium.

**Fig. 5 Model of bystander signaling in mesenchymal stromal cells (MSC) and CD34+ cells.** Irradiation of MSC may induce DNA damage (1) directly and indirectly by reactive

oxygen species (ROS). Induced protein shifts in MSC may interfere with protein metabolism (2), cytoskeleton (3), nucleus (4), energy metabolism (5) and signaling (6). Genotoxic bystander signals (2) and (5) may be transmitted to CD34+ cells. In CD34+ cells the signals may induce ROS and protein shifts interfering with protein metabolism (2), cytoskeleton (3), nucleus (4) and signaling (6) ultimately leading to DNA damage and CIN (1).

**Fig. 1**

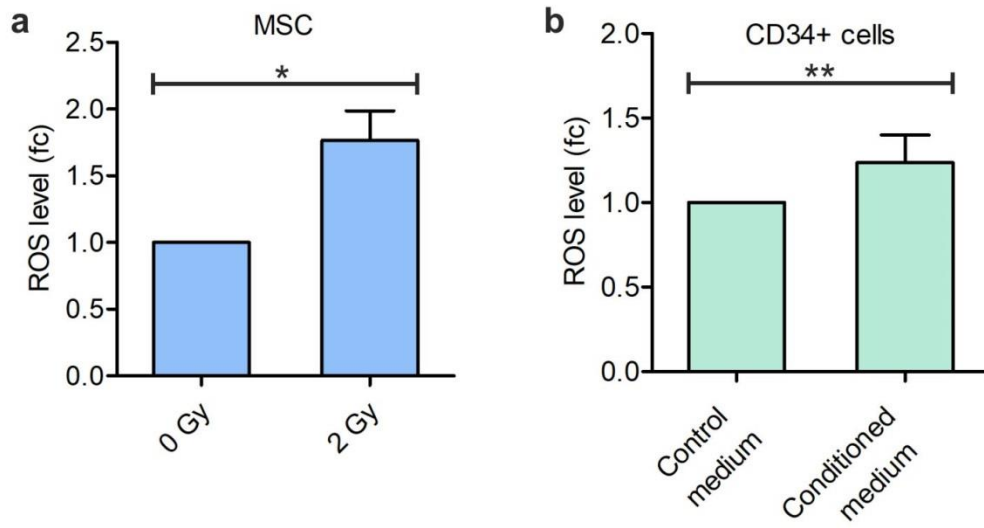

**Fig. 2**

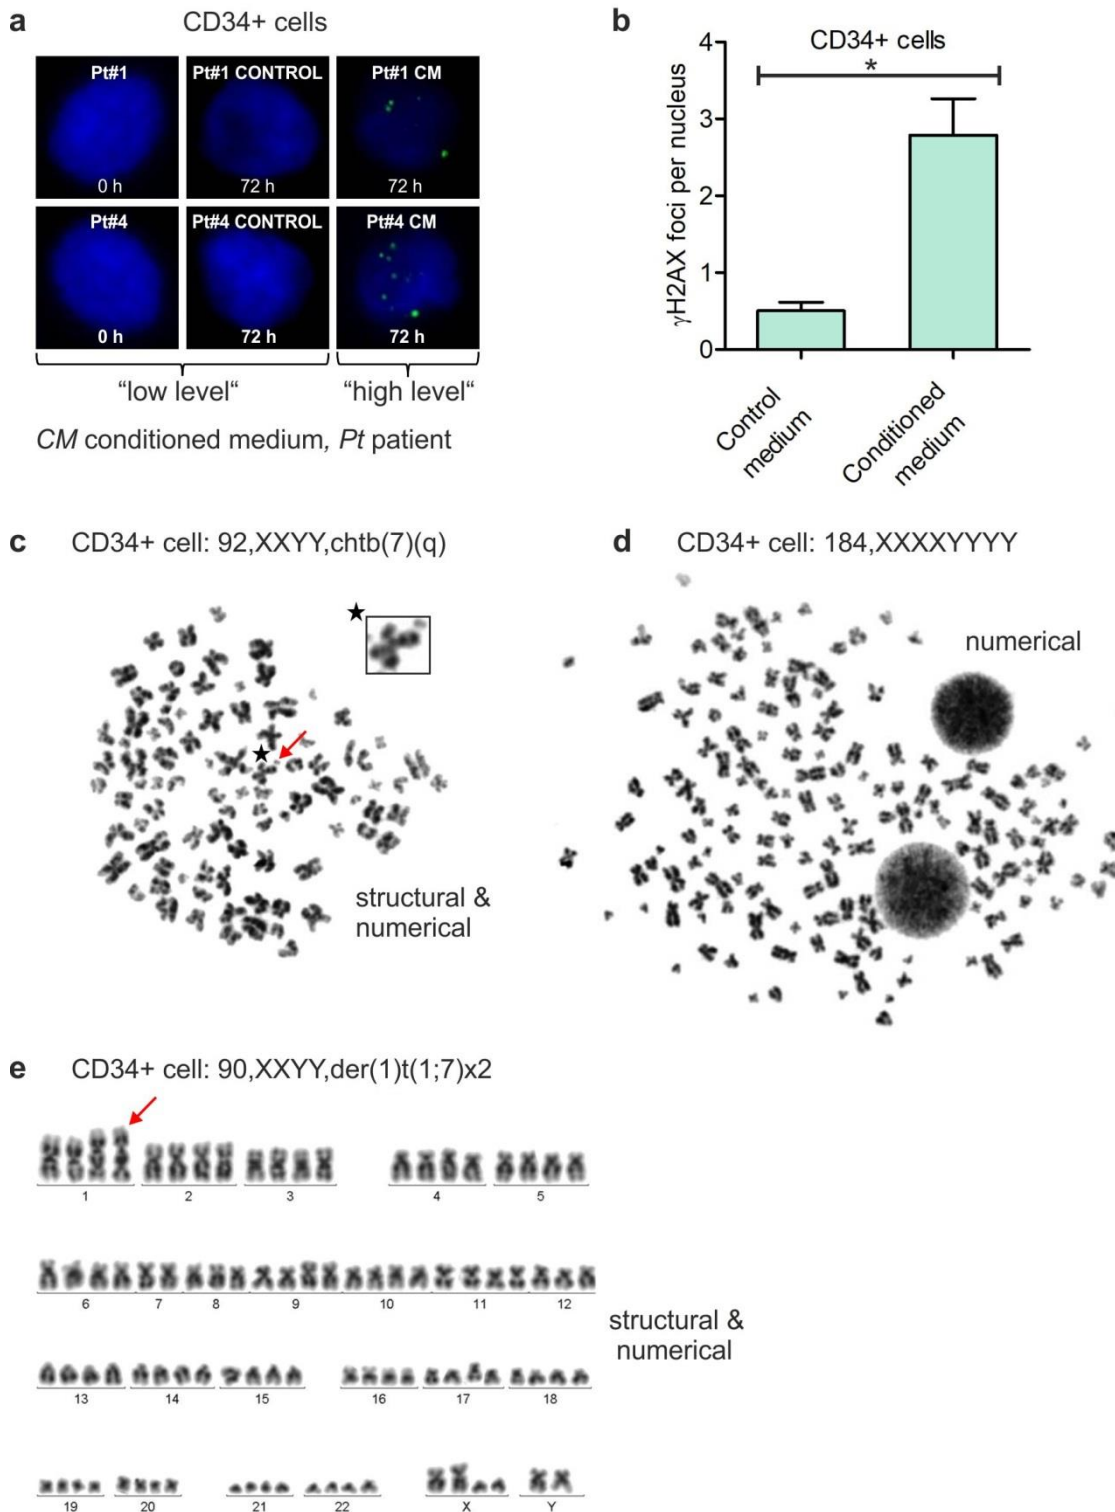

**Fig. 3**

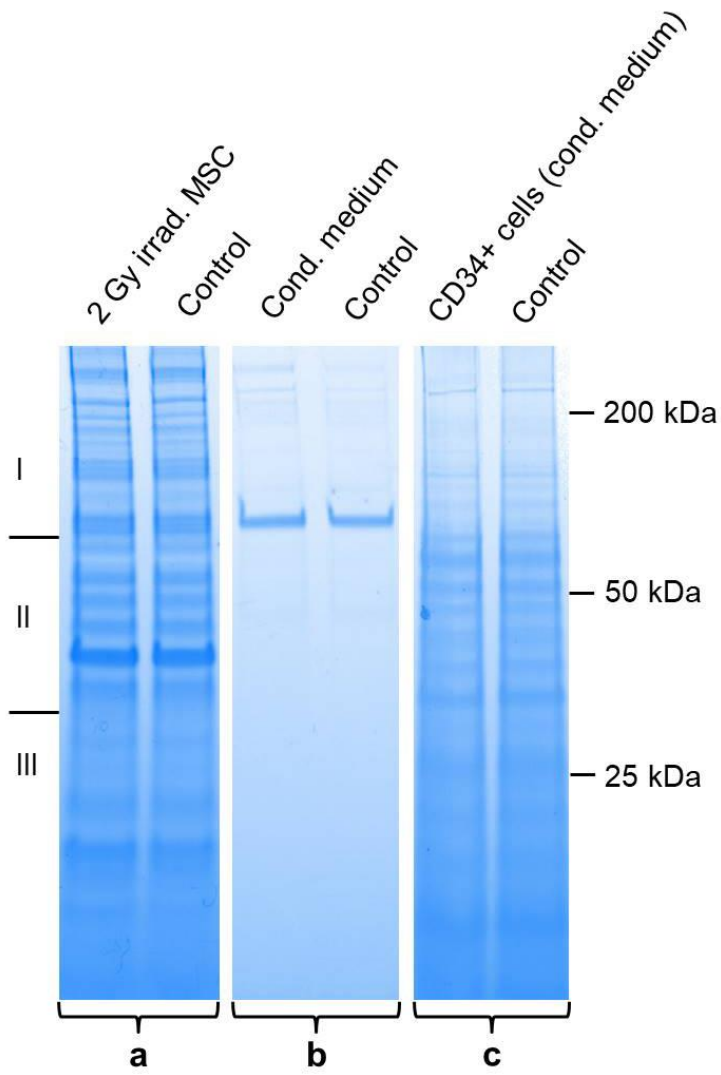

**Fig. 4**

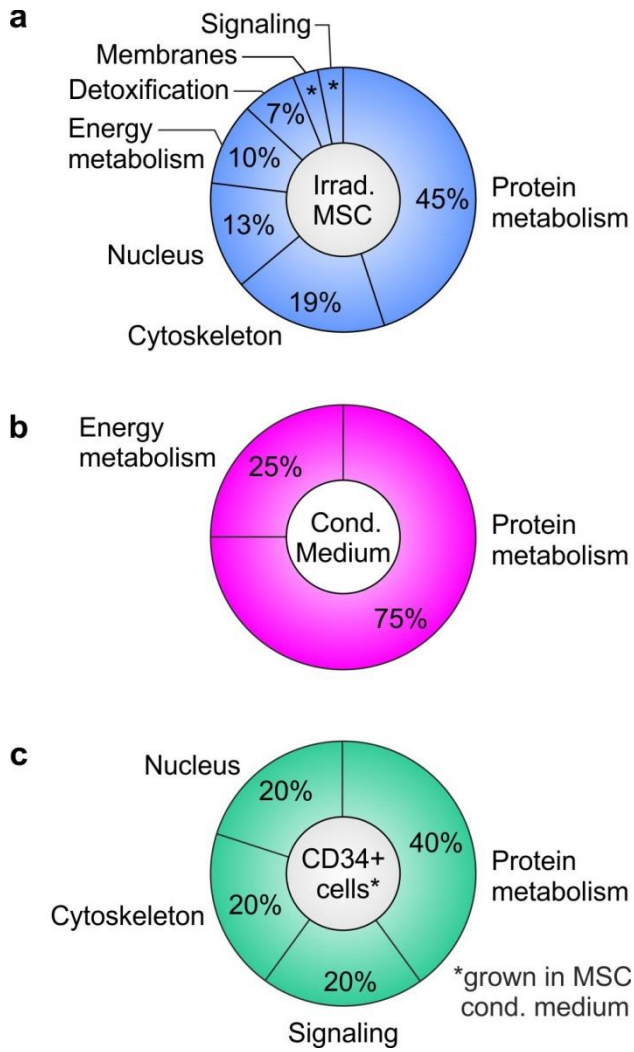

**Fig. 5**

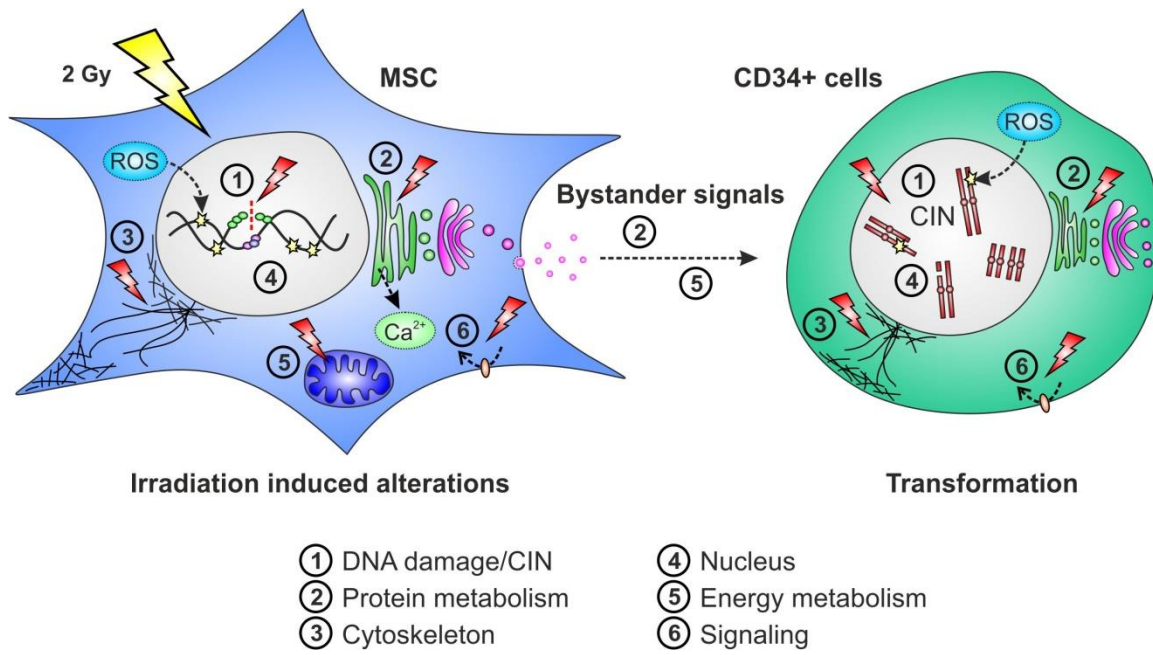

**Table 1** Radiation-induced bystander effects in CD34+ cells. *fc* fold change; *ISCN* international system for human cytogenetic nomenclature; *NA* not assessed; *Pt* patient; *ROS* reactive oxygen species.

| <b>Pt</b> | <b>Age/<br/>sex</b> | <b>ROS irradi.<br/>MSC (fc)</b> | <b>ROS CD34+ cells (fc)<br/>Cond. medium</b> | <b><math>\gamma</math>H2AX foci/<br/>CD34+ cell<br/>Control</b> | <b><math>\gamma</math>H2AX foci/<br/>CD34+ cell<br/>Cond. medium</b> | <b>Cytogenetics<br/>(ISCN)<br/>Control</b> | <b>Cytogenetics (ISCN)<br/>Cond. medium</b>                                                   | <b>Viability CD34+ cells (fc)<br/>Cond. medium</b> |
|-----------|---------------------|---------------------------------|----------------------------------------------|-----------------------------------------------------------------|----------------------------------------------------------------------|--------------------------------------------|-----------------------------------------------------------------------------------------------|----------------------------------------------------|
| #1        | 90/♂                | NA                              | NA                                           | 0.2 ± 0.1                                                       | 2.1 ± 0.5                                                            | 46,XY                                      | 46,XY[20]<br>46,XY,chtb(5q)[1]<br>46,XY,chtb(10q)[1]<br>92,XXYY[2]<br>184,XXXXYYYY[1]         | 1.0                                                |
| #2        | 56/♂                | NA                              | NA                                           | 1.1 ± 0.3                                                       | 2.0 ± 0.5                                                            | 46,XY                                      | 46,XY[22]<br>92,XXYY[2]<br>184,XXXXYYYY[1]                                                    | 1.0                                                |
| #3        | 92/♀                | NA                              | 1.4                                          | 0.3 ± 0.1                                                       | 3.4 ± 0.5                                                            | 46,XX                                      | 46,XX[18]<br>46,XX,chtb(13q)[1]<br>92,XXXX[2]<br>184,XXXXXXXX[3]<br>184,XXXXXXXX,chtb(11q)[1] | 0.8                                                |
| #4        | 58/♀                | NA                              | NA                                           | 0.8 ± 0.3                                                       | 5.4 ± 0.8                                                            | 46,XX                                      | 46,XX[19]<br>92,XXXX[3]<br>92,XXXX,chtb(6p)[1]<br>184,XXXXXXXX[2]                             | 0.9                                                |
| #5        | 85/♀                | 1.1                             | 1.5                                          | 0.4 ± 0.2                                                       | 4.1 ± 0.5                                                            | 46,XX                                      | 46,XX[24]<br>92,XXXX,chtb(7q)[1]                                                              | 1.1                                                |
| #6        | 67/♀                | 1.6                             | NA                                           | 0.3 ± 0.1                                                       | 0.7 ± 0.3                                                            | 46,XX                                      | 46,XX[25]                                                                                     | 1.0                                                |
| #7        | 77/♂                | 1.9                             | NA                                           | 0.3 ± 0.1                                                       | 2.3 ± 0.4                                                            | 46,XY                                      | 46,XY[21]<br>47,XY[2]<br>92,XXYY[1]<br>90,XXYY,der(1)t(1;7)x2[1]                              | NA                                                 |
| #8        | 54/♀                | 2.5                             | 1.6                                          | 0.9 ± 0.2                                                       | 3.5 ± 0.6                                                            | 46,XX                                      | 46,XX[22]<br>92,XXXX[3]                                                                       | 1.6                                                |



|     |      |     |     |           |           |       |                                                                                 |     |
|-----|------|-----|-----|-----------|-----------|-------|---------------------------------------------------------------------------------|-----|
| #9  | 65/♂ | 1.3 | NA  | NA        | NA        | 46,XY | 46,XY[19]<br>45,X,-Y[2]<br>45,X,-Y,chtb(5q)[1]<br>92,XXYY[2]<br>184,XXXXYYYY[1] | 1.1 |
| #10 | 58/♀ | 1.8 | NA  | 0.3 ± 0.1 | 1.6 ± 0.5 | 46,XX | 46,XX[20]<br>92,XXXX[2]<br>184,XXXXXXXX[3]                                      | NA  |
| #11 | 70/♂ | 1.1 | 1.0 | NA        | NA        | 46,XY | 46,XY[19]<br>92,XXYY[5]<br>184,XXYY[1]                                          | 1.3 |
| #12 | 59/♀ | 2.8 | 0.8 | NA        | NA        | 46,XX | 46,XX[22]<br>92,XXXX[3]                                                         | 1.1 |

---

**Table 2 Proteome alterations in 2 Gy irradiated mesenchymal stromal cells, MSC conditioned medium and CD34+ cells grown in MSC conditioned medium in comparison to controls. Gp group; PSMs peptide-to-spectrum matches.**

| Gp             | Category           | Accession No. | Protein                                                       | Function                                                 | Abundance ratio | Abundance p value | Coverage | No. of unique peptides | PSMs |
|----------------|--------------------|---------------|---------------------------------------------------------------|----------------------------------------------------------|-----------------|-------------------|----------|------------------------|------|
| Irradiated MSC | Protein metabolism | P46783        | 40S ribosomal protein S10                                     | 40S ribosomal subunit                                    | 4.3             | < 0.0001          | 20       | 2                      | 9    |
|                |                    | O00303        | Eukaryotic translation initiation factor 3 subunit F (eIF3f)* | Component of eIF-3 complex                               | 4.2             | < 0.0001          | 13       | 3                      | 11   |
|                |                    | Q10713        | Mitochondrial-processing peptidase subunit alpha              | Subunit of essential mitochondrial processing protease   | 3.8             | < 0.0001          | 6        | 2                      | 8    |
|                |                    | Q92616        | eIF-2-alpha kinase activator GCN1                             | Complex with EIF2AK4/GCN2 on translating ribosomes       | 3.2             | < 0.0001          | 6        | 9                      | 45   |
|                |                    | P62937        | Peptidyl-prolyl cis-trans isomerase A                         | Protein folding                                          | 3.1             | 0.0037            | 58       | 9                      | 67   |
|                |                    | P61289        | Proteasome activator complex subunit 3 (PA28-gamma)*          | Proteasome regulator                                     | 2.8             | 0.0101            | 16       | 3                      | 3    |
|                |                    | P26368        | Splicing factor U2AF 65 kDa subunit                           | pre-mRNA splicing and 3'-end processing                  | 2.7             | 0.0004            | 20       | 4                      | 17   |
|                |                    | Q12849        | G-rich sequence factor 1                                      | Post-transcriptional mitochondrial gene expression       | 2.3             | 0.0041            | 11       | 2                      | 7    |
|                |                    | Q86VP6        | Cullin-associated NEDD8-dissociated protein 1 (p120 CAND1)*   | Key assembly factor of SCF E3 ubiquitin ligase complexes | 2.3             | 0.0084            | 9        | 7                      | 26   |
|                |                    | P60842        | Eukaryotic initiation factor 4A-I                             | RNA helicase subunit of eIF4F complex                    | 2.1             | 0.0114            | 39       | 8                      | 63   |
|                |                    | Q5VYK3        | Proteasome adapter and scaffold protein ECM29 (ECM29)*        | Binds to 26S proteasome                                  | 2.1             | 0.0172            | 1        | 2                      | 9    |

|                   |        |                                       |                                                         |      |          |    |    |    |
|-------------------|--------|---------------------------------------|---------------------------------------------------------|------|----------|----|----|----|
|                   | P23381 | Tryptophan-tRNA ligase, cytoplasmic   | Aminoacylation of tRNA                                  | 2.0  | 0.0156   | 24 | 6  | 15 |
|                   | Q10567 | AP-1 complex subunit beta-1           | Protein sorting in trans-Golgi network and/or endosomes | 2.0  | 0.0278   | 14 | 2  | 57 |
|                   | P61513 | 60S ribosomal protein L37a            | 60S ribosomal subunit                                   | 0.39 | 0.0008   | 17 | 2  | 8  |
| Cytoskeleton      | P07942 | Laminin subunit beta-1                | Component of basal membrane                             | 2.6  | 0.0012   | 5  | 5  | 28 |
|                   | O75844 | CAAX prenyl protease 1 homolog        | Cleavage of prelamin to form lamin A                    | 2.5  | 0.0027   | 5  | 2  | 4  |
|                   | Q14195 | Dihydropyrimidinase-related protein 3 | Remodeling of cytoskeleton                              | 2.2  | 0.0054   | 14 | 4  | 17 |
|                   | Q01518 | Adenylyl cyclase-associated protein 1 | Regulator of filament dynamics                          | 2.2  | 0.0070   | 40 | 11 | 66 |
|                   | P33176 | Kinesin-1 heavy chain                 | Microtubule-dependent motor                             | 2.1  | 0.0194   | 4  | 2  | 4  |
|                   | P08670 | Vimentin                              | Intermediate filaments                                  | 0.29 | < 0.0001 | 12 | 4  | 15 |
| Nucleus           | O14980 | Exportin-1                            | Nuclear export of cellular proteins and RNA             | 5.1  | < 0.0001 | 5  | 3  | 11 |
|                   | Q96P70 | Importin-9                            | Nuclear transport receptor                              | 4.5  | < 0.0001 | 4  | 2  | 3  |
|                   | Q92621 | Nuclear pore complex protein Nup205   | Component of nuclear pore complex (NPC)                 | 3.4  | < 0.0001 | 4  | 3  | 7  |
|                   | P55060 | Exportin-2                            | Importin-alpha re-export from nucleus to cytoplasm      | 2.5  | 0.0032   | 11 | 6  | 17 |
| Energy metabolism | P00338 | L-lactate dehydrogenase A chain       | Synthesizes (S)-lactate from pyruvate                   | 3.2  | < 0.0001 | 12 | 3  | 6  |
|                   | O95336 | 6-phosphogluconolactonase             | Pentose phosphate pathway                               | 2.7  | 0.0125   | 11 | 2  | 9  |
|                   | Q8N0Y7 | Probable phosphoglycerate mutase 4    | Glycolysis                                              | 2.6  | 0.0191   | 22 | 4  | 27 |

|                               |                    |                   |                                                               |                                                                                                                        |             |          |    |    |    |
|-------------------------------|--------------------|-------------------|---------------------------------------------------------------|------------------------------------------------------------------------------------------------------------------------|-------------|----------|----|----|----|
|                               | Detoxification     | P32119            | Peroxioredoxin-2                                              | Thiol-specific peroxidase                                                                                              | qualitative | < 0.0001 | 23 | 2  | 12 |
|                               |                    | P09211            | Glutathione S-transferase P (GSTP1-1)*                        | Conjugation of reduced glutathione                                                                                     | 2.4         | 0.0340   | 22 | 3  | 12 |
|                               | Membranes          | P04216            | Thy-1 membrane glycoprotein                                   | Cell-cell and cell-matrix interactions                                                                                 | 3.9         | 0.0003   | 12 | 3  | 19 |
|                               | Signaling          | O95837/<br>P29992 | Guanine nucleotide-binding protein subunit alpha-11/14        | Transmembrane signaling<br>PLC-β, IP3, Calcium, MAPK                                                                   | 3.8         | < 0.0001 | 6  | 2  | 8  |
| <b>MSC conditioned medium</b> | Protein metabolism | P11021            | Endoplasmic reticulum chaperone BiP (GRP78)*                  | Unfolded protein response (UPR)<br>Endoplasmic reticulum protein degradation (ERAD) pathway<br>Calcium-binding protein | 3.5         | 0.0227   | 29 | 13 | 40 |
|                               |                    | P27797            | Calreticulin                                                  | Calreticulin/calnexin cycle<br>Calcium-binding protein                                                                 | 2.4         | 0.0036   | 13 | 4  | 19 |
|                               |                    | P30101            | Protein disulfide-isomerase A3 (PDIA3)*                       | Rearrangement of -S-S- bonds in proteins                                                                               | 2.0         | 0.0225   | 21 | 10 | 29 |
|                               | Energy metabolism  | P06744            | Glucose-6-phosphate isomerase                                 | Glycolysis/gluconeogenesis                                                                                             | 2.4         | 0.0006   | 9  | 4  | 7  |
| <b>CD34+ cells</b>            | Protein metabolism | P36776            | Lon protease homolog, mitochondrial                           | Degradation of misfolded or damaged polypeptides                                                                       | 4.1         | < 0.0001 | 7  | 2  | 8  |
|                               |                    | O00303            | Eukaryotic translation initiation factor 3 subunit F (eIF3f)* | Component of eIF-3 complex                                                                                             | 0.40        | < 0.0001 | 8  | 2  | 12 |
|                               | Signaling          | Q9UQ80            | Proliferation-associated protein 2G4 (EBP1)*                  | ERBB3-signaling<br>Growth regulation<br>Upregulated in AML                                                             | 2.2         | < 0.0001 | 18 | 4  | 4  |
|                               | Cytoskeleton       | P46940            | Ras GTPase-activating-like protein IQGAP1 (IQGAP1)*           | Dynamics and assembly of actin cytoskeleton                                                                            | 0.48        | < 0.0001 | 3  | 2  | 5  |
|                               | Nucleus            | P09429            | High mobility group protein B1 (HMGB1)*                       | DNA chaperone, transcription regulation, chromatin remodeling, p38-MAPK/NF-kappa B activation                          | 0.35        | < 0.0001 | 18 | 3  | 5  |

\* Short name as stated in the text

1 *Conference Proceedings Paper*

2 **Genotoxic bystander signals from irradiated human**  
3 **mesenchymal stromal cells mainly localize in the**  
4 **10 – 100 kDa fraction of conditioned medium**

5 **Vanessa Kohl** <sup>1</sup>, **Alice Fabarius** <sup>1</sup>, **Oliver Drews** <sup>2</sup>, **Miriam Bierbaum** <sup>3</sup>, **Ahmed Jawhar** <sup>4</sup>, **Ali**  
6 **Darwich** <sup>4</sup>, **Christel Weiss** <sup>5</sup>, **Johanna, Flach** <sup>1</sup>, **Susanne Brendel** <sup>1</sup>, **Helga Kleiner** <sup>1</sup>, **Wolfgang**  
7 **Seifarh** <sup>1</sup>, **Wolf-Karsten Hofmann** <sup>1</sup> and **Henning D. Popp** <sup>1,\*</sup>

8 Published: date

9 Academic Editor: name

10 <sup>1</sup> Department of Hematology and Oncology, Medical Faculty Mannheim, Heidelberg University, 68167

11 Mannheim, Germany; [Vanessa.Kohl@medma.uni-heidelberg.de](mailto:Vanessa.Kohl@medma.uni-heidelberg.de) (V.K.); [Alice.Fabarius@medma.uni-heidelberg.de](mailto:Alice.Fabarius@medma.uni-heidelberg.de) (A.F.); [Johanna.Flach@medma.uni-heidelberg.de](mailto:Johanna.Flach@medma.uni-heidelberg.de) (J.F.); [Susanne.Brendel@medma.uni-heidelberg.de](mailto:Susanne.Brendel@medma.uni-heidelberg.de) (S.B.); [Helga.Kleiner@medma.uni-heidelberg.de](mailto:Helga.Kleiner@medma.uni-heidelberg.de) (H.K.);

12 [Wolfgang.Seifarh@medma.uni-heidelberg.de](mailto:Wolfgang.Seifarh@medma.uni-heidelberg.de) (W.S.); [w.k.hofmann@medma.uni-heidelberg.de](mailto:w.k.hofmann@medma.uni-heidelberg.de) (W.-K.H.)

13 <sup>2</sup> Department of Clinical Chemistry, University Medical Center Mannheim, 68167 Mannheim, Germany;

14 [Oliver.Drews@umm.de](mailto:Oliver.Drews@umm.de) (O.D.)

15 <sup>3</sup> Department of Radiation Oncology, Medical Faculty Mannheim, Heidelberg University, 68167 Mannheim,

16 Germany; [Miriam.Bierbaum@medma.uni-heidelberg.de](mailto:Miriam.Bierbaum@medma.uni-heidelberg.de) (M.B.)

17 <sup>4</sup> Department of Orthopedics and Trauma Surgery, Medical Faculty Mannheim, Heidelberg University,

18 68167 Mannheim, Germany; [Ahmed.Jawhar@medma.uni-heidelberg.de](mailto:Ahmed.Jawhar@medma.uni-heidelberg.de) (A.J.); [alidarwich@mail.com](mailto:alidarwich@mail.com) (A.D.)

19 <sup>5</sup> Department of Medical Statistics and Biomathematics, Medical Faculty Mannheim, Heidelberg University,

20 68167 Mannheim, Germany; [Christel.Weiss@medma.uni-heidelberg.de](mailto:Christel.Weiss@medma.uni-heidelberg.de) (C.W.)

21 \* Correspondence: [Henning.Popp@medma.uni-heidelberg.de](mailto:Henning.Popp@medma.uni-heidelberg.de); Tel.: +49-621-383-71307

22

23

24 **Abstract:** Genotoxic bystander signals released from irradiated human mesenchymal stromal cells  
25 (MSC) may induce radiation-induced bystander effects (RIBE) in human hematopoietic stem and  
26 progenitor cells (HSPC) potentially causing leukemic transformation. Although the source of  
27 bystander signals is evident, the identification and characterization of these signals is challenging.  
28 Here, RIBE were analyzed in human CD34+ cells cultured in distinct molecular size fractions of  
29 medium conditioned by 2 Gy irradiated human MSC. Specifically,  $\gamma$ H2AX foci (as a marker of  
30 DNA double-strand breaks) and chromosomal instability were evaluated in CD34+ cells grown in  
31 approximate (I) < 10 kDa, (II) 10 – 100 kDa and (III) > 100 kDa fractions of MSC conditioned  
32 medium and un-/fractionated control medium, respectively. Hitherto, significantly increased  
33 numbers of  $\gamma$ H2AX foci and aberrant metaphases were detected in CD34+ cells grown in the (II) 10  
34 – 100 kDa fraction when compared to (I) < 10 kDa or (III) > 100 kDa fractions or un-/fractionated  
35 control medium. Furthermore, RIBE disappeared after heat inactivation of medium at 75 °C. Taken  
36 together, our data suggest that RIBE are mainly mediated by the heat-sensitive (II) 10 – 100 kDa  
37 fraction of MSC conditioned medium. We postulate proteins as RIBE mediators and in-depth  
38 proteome analyses to identify key bystander signals, which is fundamental for the development of  
39 next-generation anti-leukemic drugs.

40 **Keywords:** irradiation; mesenchymal stromal cells; CD34+ cells; bystander signals; bystander  
41 effects; leukemia

42

43

## 44 1. Introduction

45 Genotoxic bystander signals released from irradiated human mesenchymal stromal cells (MSC)  
46 may induce radiation-induced bystander effects (RIBE) in non-irradiated human hematopoietic stem  
47 and progenitor cells (HSPC) potentially initiating myeloid neoplasms (MN). In the 2016 WHO  
48 classification, MN that arise after irradiation therapy are referred to as therapy-related MN (t-MN)  
49 [1]. As t-MN are characterized by high-risk genetic alterations [2,3] and a particularly worse  
50 prognosis [4,5], novel therapeutic strategies are urgently needed.

51 Generally, RIBE describe ‘out-of-field’ effects of irradiation in non-irradiated cells that are  
52 comparable to effects in irradiated cells. RIBE may emerge as DNA damage (e.g., increased  $\gamma$ H2AX  
53 foci, gene mutations, chromosomal aberrations, micronuclei), cell death (e.g., apoptosis, necrosis)  
54 and induction of cell survival mechanisms (e.g., adaptive response, DNA repair) [6-9]. Bystander  
55 signals are assumed to be initiated in irradiated cells by calcium fluxes [10] and mitochondrial  
56 metabolites [11-13]. Then, small molecules like nitric oxide (NO) [14], reactive oxygen species (ROS)  
57 [15], nuclear factor-kappa B (NF-kappa B) [13], and transforming growth factor beta-1 (TGFbeta-1)  
58 [16,17] may pass through cell membranes and gap junctions from the intracellular towards the  
59 extracellular space [18,19]. Hereupon, the bystander signals might be transmitted to non-irradiated  
60 cells that are referred to as bystander cells. Finally, ROS generated by NADH oxidases [20] and  
61 distinct RIBE mediators may be induced in affected bystander cells, thereby potentially initiating  
62 malignant transformation.

63 The analysis of bystander signals is a cutting-edge field in leukemia research. Here, irradiated  
64 healthy human MSC and healthy human CD34+ cells from the same donors were investigated in an  
65 *in vitro* model system that enables characterization of genotoxic signaling factors. Specifically,  
66 molecular size fractions of MSC conditioned medium of approximate (I) < 10 kDa, (II) 10 – 100 kDa  
67 and (III) > 100 kDa molecular weight were used for culture of CD34+ cells of the same donors.  
68 Afterwards, RIBE were analyzed in exposed CD34+ cells in terms of DNA damage and chromosomal  
69 instability (CIN). The data may provide important information on the fraction of interest in MSC  
70 conditioned medium to be analyzed most profitable by in-depth proteome analysis for the  
71 identification of key bystander signals, which might contribute to the development of  
72 next-generation anti-leukemic drugs.

## 73 2. Experiments

### 74 2.1. Preparation of human femoral heads

75 This study was approved by the Ethics Committee II, Medical Faculty Mannheim, Heidelberg  
76 University (no. 2019-1128N). Procedures were performed in accordance with the local ethical  
77 standards and the principles of the 1964 Helsinki Declaration and its later amendments. Written  
78 informed consent was obtained from all study participants. Femoral heads were collected from 6  
79 patients with coxarthrosis (1 female, 5 males, mean age: 68 years) undergoing hip replacement.

### 80 2.2. Isolation of human MSC

81 Bones were broken into fragments and incubated for 1 hour at 37 °C in phosphate-buffered  
82 saline (PBS) supplemented with 1 mg/ml collagenase type I (Thermo Fisher, Waltham, US).  
83 Supernatants were filtered in a cell strainer with 100  $\mu$ m nylon mesh pores (Greiner Bio-One,  
84 Kremsmünster, Austria). Afterwards, bone fragments retained in the cell strainer were transferred  
85 into StemMACS MSC Expansion Media XF (Miltenyi Biotec, Bergisch Gladbach, Germany)  
86 supplemented with 1% penicillin/streptomycin. Then, adherent MSC were expanded in T175 flasks  
87 in a humidified 5% CO<sub>2</sub> atmosphere at 37 °C and passaged at 80% confluency.

### 88 2.3. Isolation of human CD34+ cells

Cell-to-Cell Metabolic Cross-Talk in Physiology and Pathology(Cells 2020), 16–28 November 2020

89 CD34+ cells were isolated from bone marrow mononuclear cells by Ficoll density gradient  
90 centrifugation and magnetic-activated cell sorting using CD34 antibody-conjugated microbeads  
91 (Miltenyi Biotec). CD34+ cells were grown in StemSpan SFEM II medium (Stemcell Technologies,  
92 Vancouver, Canada) supplemented with StemSpan Myeloid Expansion supplement (SCF, TPO,  
93 G-CSF, GM-CSF) (Stemcell Technologies) and 1% penicillin/streptomycin in a humidified 5% CO<sub>2</sub>  
94 atmosphere at 37 °C.

#### 95 *2.4. Preparation of fractions of MSC conditioned medium*

96 MSC were grown in T175 flasks until reaching 80% confluency. MSC were rinsed in PBS and  
97 fresh StemSpan SFEM II medium was added. Afterwards, MSC were 2 Gy irradiated by 6 MV x-rays  
98 in a Versa HD linear accelerator (Elekta, Stockholm, Sweden), while control MSC were not  
99 irradiated. MSC conditioned medium and control medium were obtained from irradiated and  
100 non-irradiated MSC, respectively, after 4 h incubation at 37 °C. The collected medium was  
101 centrifuged (1.200 rpm, 10 min) and supernatants were filtered through 10 kDa molecular weight  
102 cut-off (MWCO) ultrafiltration centrifugal filter units (Amicon Ultra, Merck, Darmstadt, Germany)  
103 to obtain (I) approximate < 10 kDa fractions of MSC conditioned and control medium, respectively.  
104 Next, the supernatant above the filter was adjusted with fresh medium to the original volume and  
105 filtered through 100 kDa MWCO ultrafiltration centrifugal filter units to obtain (II) approximate 10 –  
106 100 kDa fractions of MSC conditioned and control medium, respectively. Finally, the supernatant  
107 above the filter was adjusted with fresh medium to the original volume and then contained (III)  
108 approximate > 100 kDa fractions of MSC conditioned and control medium, respectively. The distinct  
109 fractions (I) – (III) of MSC conditioned and control medium were stored at – 20 °C.

#### 110 *2.5. Heat inactivation of MSC conditioned and control medium*

111 Heat inactivation of RIBE mediators in un-/fractionated MSC conditioned medium and un-/  
112 fractionated control medium was performed by incubation at 75 °C for 20 min.

#### 113 *2.6. RIBE analysis*

114 RIBE were analyzed in CD34+ cell samples (6 patients) at day 6 after culture for 3 days in native  
115 medium followed by culture for 3 days in un-/fractionated MSC conditioned medium or in un-/  
116 fractionated control medium, respectively. In addition, experiments with CD34+ cell samples (2  
117 patients) were performed with MSC conditioned medium after heat inactivation.

#### 118 *2.7. Immunofluorescence staining of $\gamma$ H2AX*

119 Immunofluorescence staining of  $\gamma$ H2AX was performed in CD34+ cells using a JBW301 mouse  
120 monoclonal anti- $\gamma$ H2AX antibody (Merck) and an Alexa Fluor 488-conjugated goat anti-mouse  
121 secondary antibody (Thermo Fisher) [21,22]. At least 50 nuclei were analyzed in each sample.

#### 122 *2.8. Cytogenetic analysis*

123 Cytogenetic analysis of G-banded chromosomes was performed in CD34+ cells according to  
124 standard procedures [23]. At least 25 metaphases were analyzed in each sample following the ISCN  
125 2016 [24]. Sporadic chromosomal alterations (e.g., chromatid breaks (chtb), chromosome breaks,  
126 trisomy) were included in the karyotype (non-clonal events) when detected in at least one  
127 metaphase. Because tetraploid/octaploid metaphases were detected at low frequency in CD34+ cells  
128 grown in control medium as well, they were only included in karyotypes in case of clonality  
129 (tetraploidy and/or octaploidy in two or more metaphases) according to the ISCN 2016.

#### 130 *2.9. Statistical analysis*

Cell-to-Cell Metabolic Cross-Talk in Physiology and Pathology(Cells 2020), 16–28 November 2020

131 Statistical analysis was performed with SAS software, release 9.4 (SAS Institute, Cary, US). For  
132 quantitative variables, mean values and standard deviations were calculated. Categorical factors are  
133 presented with absolute and relative frequencies. In order to compare more than two groups,  
134 Kruskal-Wallis tests were performed. For pairwise group comparisons, exact Wilcoxon two-sample  
135 tests were used. In general, test results with  $p < 0.05$  was considered as statistically significant.

### 136 3. Results

#### 137 3.1. Evaluation of cell-free MSC conditioned medium

138 In order to prevent a transfer of MSC by MSC conditioned medium to the CD34+ cell cultures  
139 only centrifuged supernatants were used. In addition, (i) microscopic evaluation of supernatants in a  
140 Neubauer counting chamber, (ii) sterile filtration of supernatants and (iii) cytogenetic cross-over  
141 experiments using sexually divergent CD34+ cells and MSC could exclude transfer of MSC to the  
142 CD34+ cell cultures in our experiments.

#### 143 3.2. DNA damage in human CD34+ cells

144  $\gamma$ H2AX foci were analyzed in human CD34+ cell samples (4 patients;  $\Sigma$  32 samples) expanded  
145 for 3 days in native medium followed by culture for 3 days in un-/fractionated MSC conditioned or  
146 un-/fractionated control medium, respectively (Figure 1a). Increased numbers of  $\gamma$ H2AX foci  
147 (general  $p = 0.0068$  [Kruskal-Wallis test]; pairwise comparison each  $p = 0.0286$  [Wilcoxon two-sample  
148 test]) were detected in CD34+ cells grown in the (II) 10 – 100 kDa fraction of MSC conditioned  
149 medium ( $0.67 \pm 0.10$   $\gamma$ H2AX foci per CD34+ cell; mean  $\pm$  standard error of mean) when compared to  
150 numbers of  $\gamma$ H2AX foci in CD34+ cells grown in (I)  $< 10$  kDa ( $0.19 \pm 0.01$   $\gamma$ H2AX foci per CD34+ cell)  
151 and (III)  $> 100$  kDa ( $0.23 \pm 0.04$   $\gamma$ H2AX foci per CD34+ cell) fractions or in un-/fractionated control  
152 medium ( $0.12 \pm 0.01$   $\gamma$ H2AX foci per CD34+ cell). Since  $\gamma$ H2AX foci are a marker of DNA  
153 double-strand breaks (DSB), our findings suggest that DNA damage signaling factors mainly  
154 localize in the (II) 10 – 100 kDa fraction of MSC conditioned medium.  
155

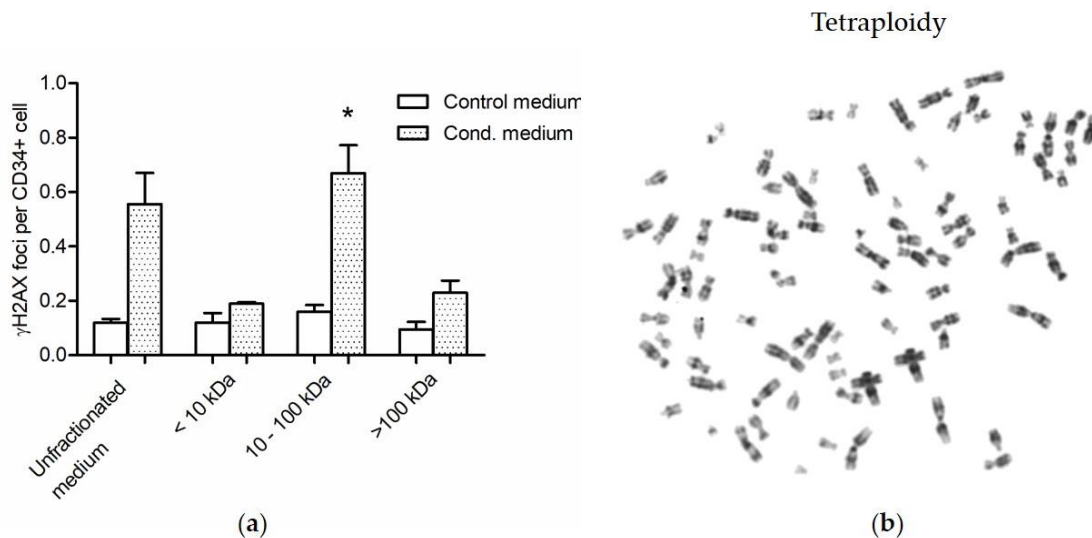

156

157 **Figure 1.** Radiation-induced bystander effects in CD34+ cells grown in distinct molecular size  
158 fractions of medium conditioned by 2 Gy irradiated mesenchymal stromal cells (MSC) and un-/  
159 fractionated control medium. (a)  $\gamma$ H2AX foci levels in CD34+ cells grown in (I)  $< 10$  kDa, (II) 10 – 100  
160 kDa and (III)  $> 100$  kDa fractions of MSC conditioned medium and in un-/fractionated control  
161 medium. \*  $p = 0.0068$  [Kruskal-Wallis test] and  $p = 0.0286$  [Wilcoxon two-sample test] when  
162 compared to numbers of  $\gamma$ H2AX foci in CD34+ cells grown in (I)  $< 10$  kDa and (III)  $> 100$  kDa



Cell-to-Cell Metabolic Cross-Talk in Physiology and Pathology(Cells 2020), 16–28 November 2020

163

fractions or in un-/fractionated control medium. **(b)** Exemplary tetraploidy of a CD34+ cell grown

164

in the (II) 10 – 100 kDa fraction of MSC conditioned medium.

165  
166

**Table 1.** Radiation-induced bystander effects in CD34+ cells grown in un-/fractionated medium conditioned by 2 Gy irradiated mesenchymal stromal cells.  
CM, conditioned medium; NA, not assessed.

| Pt | Age/<br>sex | No fractionation         |                                                                                                                                     | < 10 kDa                |                                 | 10 – 100 kDa            |                                                                               | > 100 kDa                    |                                                         |
|----|-------------|--------------------------|-------------------------------------------------------------------------------------------------------------------------------------|-------------------------|---------------------------------|-------------------------|-------------------------------------------------------------------------------|------------------------------|---------------------------------------------------------|
|    |             | Control                  | CM                                                                                                                                  | Control                 | CM                              | Control                 | CM                                                                            | Control                      | CM                                                      |
| #1 | 84/♀        | 46,XX[25]                | 46,XX[20]<br>53,XX,+1,+2,+5,+6,+14,+21,+22[1]<br>92,XXXX[4]                                                                         | 46,XX[20]               | 46,XX[25]                       | 46,XX[25]               | 46,XX[22]<br>92,XXXX[3]                                                       | NA                           | NA                                                      |
| #2 | 65/♂        | 46,XY[25]                | 46,XY[20]<br>92,XXXX[1]<br>184,XXXXYYYY,chtb(11)(q23)[1]<br>46,XY,dup(13q)[1]<br>47,XY,+21,chtb(11)(p12)[1]<br>46,XY,chtb(9)(12)[1] | 46,XY[25]               | 46,XY[22]                       | 46,XY[25]               | 46,XY[21]<br>92,XXXX[2]<br>69,XXY[1]<br>47,XY,+3[1]                           | 46,XY[25]                    | 46,XY[25]                                               |
| #3 | 62/♂        | 46,XY[25]                | 46,XY[22]<br>92,XXYY[3]                                                                                                             | 46,XY[25]               | 46,XY[25]                       | 46,XY[25]               | 46,XY[20]<br>92,XXYY[3]<br>46,XY,chtb(5)(q33)[1]<br>46,XY,+f[1]               | 46,XY[25]                    | 46,XY[25]                                               |
| #4 | 62/♂        | 46,XY[25]                | 46,XY[21]<br>92,XXYY[3]<br>92,XXYY,chtb(2p)[1]                                                                                      | 46,XY[25]               | 46,XY[23]<br>46,XY,chtb(14q)[1] | 46,XY[25]               | 46,XY[22]<br>92,XXYY[1]<br>184,XXXXYYYY[1]<br>46,XY,chtb(7p)[1]               | 46,XY[23]<br>184,XXXXYYYY[2] | 46,XY[25]                                               |
| #5 | 85/♂        | 46,XY[13]<br>45,X,-Y[12] | 46,XY[10]<br>45,X,-Y[12]<br>90,XX,-Y,-Y[1]<br>92,XXYY[1]<br>184,XXXXYYYY[1]                                                         | 46,XY[5]<br>45,X,-Y[20] | 46,XY[7]<br>45,X,-Y[18]         | 46,XY[21]<br>45,X,-Y[4] | 46,XY[18]<br>45,X,-Y[3]<br>92,XXYY[2]<br>47,XY,+2[1]<br>50,XY,+1,+7,+9,+14[1] | 46,XY[10]<br>45,X,-Y[15]     | 46,XY[13]<br>45,X,-Y[7]<br>92,XXYY[1]<br>90,XX,-Y,-Y[1] |
| #6 | 52/♂        | 46,XY[25]                | 46,XY[22]<br>92,XXYY[2]<br>184,XXXXYYYY[1]                                                                                          | 46,XY[25]               | 46,XY[24]<br>46,XY,+f[1]        | 46,XY[21]               | 46,XY[21]<br>92,XXYY[3]<br>184,XXXXYYYY[1]                                    | 46,XY[25]                    | 46,XY[25]                                               |

167 3.2. Chromosomal instability in human CD34+ cells

168 Metaphases were analyzed in human CD34+ cell samples (6 patients;  $\Sigma$  46 samples) expanded  
169 for 3 days in native medium followed by culture for 3 days in un-/fractionated MSC conditioned or  
170 un-/fractionated control medium, respectively (Figure 1b, Table 1). Increased numbers of aberrant  
171 metaphases (general  $p = 0.0007$  [Kruskal-Wallis test]; pairwise comparison each  $p = 0.0022$  [Wilcoxon  
172 two-sample test]) were detected in CD34+ cells grown in the (I) 10 – 100 kDa fraction of MSC  
173 conditioned medium when compared to numbers of aberrant metaphases in CD34+ cells grown in  
174 (II) < 10 kDa and (III) > 100 kDa fractions of MSC conditioned medium or in un-/fractionated control  
175 medium. More precisely, distinct chromatid breaks (chtb), e.g., chtb(5q) and chtb(7q) as well as  
176 aneuploidies, e.g., tetraploidies and octaploidies, were observed in CD34+ cells grown in the (II) 10 –  
177 100 kDa fraction of MSC conditioned medium. In addition, distinct chtb, e.g., chtb(2), chtb(9) and  
178 chtb(11) as well as aneuploidies, e.g., tetraploidies and octaploidies, were observed in CD34+ cells  
179 grown in unfractionated MSC conditioned medium. It has to be noted, that loss of chromosome Y in  
180 #5 is a common finding in elderly men occurring at a frequency of 5 – 10% [25,26]. Further, few  
181 chromosomal aberrations, e.g., chtb(14q) and aneuploidies, e.g., tetraploidies, were detected at very  
182 low frequencies in (I) < 10 kDa and (III) > 100 kDa fractions of MSC conditioned medium, which  
183 might be due to limitations in accuracy of the filtration process.

184 Finally, heat inactivation of unfractionated MSC conditioned medium and unfractionated  
185 control medium (2 patients,  $\Sigma$  4 samples) resulted in reduced proliferation of CD34+ cells. Here, all  
186 evaluable metaphases displayed a normal karyotype.

187 4. Discussion

188 Genotoxic bystander signals released from irradiated human MSC may induce DNA damage  
189 and CIN in human HSPC potentially initiating MN. While increased DNA damage and CIN are  
190 readily inducible in human CD34+ cells by exposure to MSC conditioned medium, the genotoxic  
191 bystander signals in MSC conditioned medium remain largely uncharacterized yet. Therefore, our  
192 study was designed to investigate the molecular features of bystander signals in terms of molecular  
193 weight and potential protein characteristics. For this purpose, approximate (I) < 10 kDa, (II) 10 – 100  
194 kDa and (III) > 100 kDa fractions of MSC conditioned medium were generated for co-culture  
195 experiments in healthy human CD34+ cells of the same donors.

196 Increased numbers of  $\gamma$ H2AX foci were detected in CD34+ cells grown in the (II) 10 – 100 kDa  
197 fraction of MSC conditioned medium when compared to low numbers of  $\gamma$ H2AX foci in CD34+ cells  
198 grown in (I) < 10 kDa and (III) > 100 kDa fractions of MSC conditioned medium or in  
199 un-/fractionated control medium. As  $\gamma$ H2AX foci are a marker of DSB, our data are in line with  
200 similarly increased numbers of chtb detected in CD34+ cells grown in the (II) 10 – 100 kDa fraction of  
201 MSC conditioned medium. Importantly, chtb may activate oncogenes or inactivate tumor  
202 suppressor genes, respectively, thus providing a potential mechanistic link to the initiation of MN  
203 [27].

204 Further, increased numbers of aberrant metaphases were observed in CD34+ cells grown in the  
205 (II) 10 – 100 kDa fraction of MSC conditioned medium when compared to low numbers of aberrant  
206 metaphases in CD34+ cells grown in (I) < 10 kDa and (III) > 100 kDa fractions of MSC conditioned  
207 medium or in un-/fractionated control medium. In particular, the number of tetraploidies was  
208 increased in the (II) 10 – 100 kDa fraction of MSC conditioned medium. Generally, tetraploidies may  
209 occur by chromosomal non-disjunction during mitosis or cytokinesis failure [28]. Further,  
210 tetraploidies are found in about 1% of AML but 13% of t-AML cases [29]. Hence, our finding of  
211 increased tetraploidies in CD34+ cells grown in the (II) 10 – 100 kDa fraction of MSC conditioned  
212 medium suggests a mechanistic link to the initiation of MN. Although tetraploidies occurred at very  
213 low frequency in CD34+ cells grown in control medium, this result is not contradictory to our  
214 interpretations but indicates that tetraploidies may randomly occur *in vitro* during the proliferation  
215 process itself.

Cell-to-Cell Metabolic Cross-Talk in Physiology and Pathology(Cells 2020), 16–28 November 2020

216 Finally, heat inactivation of unfractionated MSC conditioned and control medium resulted in  
217 reduced proliferation of CD34+ cells, which all demonstrated regular karyotypes. Thus, RIBE  
218 mediators have a temperature-sensitive structure, supporting the notion that the three-dimensional  
219 conformation of macromolecules, such as the native tertiary structure in proteins, confers  
220 specifically to the genotoxic effects in the (II) 10 – 100 kDa fraction of MSC conditioned medium  
221 instead of the sheer presence of mediating macromolecules.

222 Our study may raise the question for the impact of ROS and NO as potential RIBE mediators in  
223 the 10 – 100 kDa fraction of MSC conditioned medium. Considering that ROS and NO are rather  
224 short-lived mediator molecules, there might be no major impact of MSC released ROS and NO on  
225 detected RIBE in CD34+ cells in our experiments. More likely, hitherto unknown mediators with a  
226 longer half-life may increase ROS and NO in exposed CD34+ cells grown in MSC conditioned  
227 medium [20].

## 228 5. Conclusions

229 In conclusion, our data demonstrate that substantial genotoxic bystander signals mainly  
230 localize in the (II) 10 – 100 kDa fraction of MSC conditioned medium and that these signals are  
231 heat-sensitive. Based on these biochemical properties, we postulate proteins as RIBE mediators,  
232 which should be further analyzed by an in-depth proteome analysis of the corresponding fraction.  
233 Ultimately, it has the potential to uncover the identity of key bystander signals, which is  
234 fundamental for the development of next-generation anti-leukemic drugs.

235 **Acknowledgments:** This research was funded by Deutsche José Carreras Leukämie-Stiftung, DJCLS 14 R/2017.

236 **Author Contributions:** Conceptualization, H.D.P. and O.D.; methodology, H.D.P and O.D.; software, V.K. and  
237 A.F.; validation, V.K., A.F. and H.D.P.; formal analysis, C.W.; investigation, V.K., S.B. and A.F.; resources, H.K.,  
238 A.D., A.J., M.B., W.S., A.F. and W.-K.H.; data curation, V.K., A.F. and H.D.P.; writing—original draft  
239 preparation, H.D.P; writing—review and editing, H.D.P., O.D., J.F., W.S., A.F. and W.-K.H.; visualization,  
240 H.D.P.; supervision, A.F. and W.-K.H.; project administration, H.D.P.; funding acquisition, H.D.P. and A.F. All  
241 authors have read and agreed to the published version of the manuscript.

242 **Conflicts of Interest:** The authors declare no conflict of interest.

## 243 Abbreviations

244 The following abbreviations are used in this manuscript:

245 chtb: chromatid breaks

246 CIN: chromosomal instability

247 DSB: DNA double-strand breaks

248 HSPC: human hematopoietic stem and progenitor cells

249 MN: myeloid neoplasms

250 MSC: mesenchymal stromal cells

251 NO: nitric oxide

252 PBS: phosphate-buffered saline

253 RIBE: radiation-induced bystander effects

254 ROS: reactive oxygen species

255 t-MN: therapy-related MN

## 256 References

- 257 1. Vardiman, J. W.; Arber, D. A.; Brunning, R. D., Larson, R.A., Matutes, E., Baumann, I., Kvasnicka, H. M.  
258 Therapy-related myeloid neoplasms. In *WHO Classification of Tumours of Haematopoietic and Lymphoid*  
259 *Tissues*, 4th ed.; Swerdlow, S.H., Campo, E., Harris, N.L., Jaffe E.S., Pileri, S.A., Stein, H., Thiele, J., Arber,  
260 D.A., Hasserjian, R.P., Le Beau, M.M., Orazi, A., Siebert, R., Eds.; International Agency for Research on  
261 Cancer: Lyon, France, 2017; pp. 153-155.

Cell-to-Cell Metabolic Cross-Talk in Physiology and Pathology(Cells 2020), 16–28 November 2020

- 262 2. Ok, C. Y.; Patel, K. P.; Garcia-Manero, G.; Routbort, M. J.; Fu, B.; Tang, G.; Goswami, M.; Singh, R.;  
263 Kanagal-Shamanna, R.; Pierce, S. A.; Young, K. H.; Kantarjian, H. M.; Medeiros, L. J.; Luthra, R.; Wang, S.  
264 A., Mutational profiling of therapy-related myelodysplastic syndromes and acute myeloid leukemia by  
265 next generation sequencing, a comparison with de novo diseases. *Leuk Res* **2015**, 39, (3), 348-54.
- 266 3. Wong, T. N.; Ramsingh, G.; Young, A. L.; Miller, C. A.; Touma, W.; Welch, J. S.; Lamprecht, T. L.; Shen, D.;  
267 Hundal, J.; Fulton, R. S.; Heath, S.; Baty, J. D.; Klco, J. M.; Ding, L.; Mardis, E. R.; Westervelt, P.; DiPersio, J.  
268 F.; Walter, M. J.; Graubert, T. A.; Ley, T. J.; Druley, T.; Link, D. C.; Wilson, R. K., Role of TP53 mutations in  
269 the origin and evolution of therapy-related acute myeloid leukaemia. *Nature* **2015**, 518, (7540), 552-555.
- 270 4. Fianchi, L.; Pagano, L.; Piciocchi, A.; Candoni, A.; Gaidano, G.; Breccia, M.; Criscuolo, M.; Specchia, G.;  
271 Maria Pogliani, E.; Maurillo, L.; Aloe-Spiriti, M. A.; Mecucci, C.; Niscola, P.; Rossetti, E.; Mansueto, G.;  
272 Rondoni, M.; Fozza, C.; Invernizzi, R.; Spadea, A.; Fenu, S.; Buda, G.; Gobbi, M.; Fabiani, E.; Sica, S.;  
273 Hohaus, S.; Leone, G.; Voso, M. T., Characteristics and outcome of therapy-related myeloid neoplasms:  
274 Report from the Italian network on secondary leukemias. *Am J Hematol* **2015**, 90, (5), E80-5.
- 275 5. Granfeldt Ostgard, L. S.; Medeiros, B. C.; Sengelov, H.; Norgaard, M.; Andersen, M. K.; Dufva, I. H.; Friis,  
276 L. S.; Kjeldsen, E.; Marcher, C. W.; Preiss, B.; Severinsen, M.; Norgaard, J. M., Epidemiology and Clinical  
277 Significance of Secondary and Therapy-Related Acute Myeloid Leukemia: A National Population-Based  
278 Cohort Study. *J Clin Oncol* **2015**, 33, (31), 3641-9.
- 279 6. Azzam, E. I.; de Toledo, S. M.; Raaphorst, G. P.; Mitchel, R. E., Low-dose ionizing radiation decreases the  
280 frequency of neoplastic transformation to a level below the spontaneous rate in C3H 10T1/2 cells. *Radiat*  
281 *Res* **1996**, 146, (4), 369-73.
- 282 7. Watson, G. E.; Lorimore, S. A.; Macdonald, D. A.; Wright, E. G., Chromosomal instability in unirradiated  
283 cells induced in vivo by a bystander effect of ionizing radiation. *Cancer Res* **2000**, 60, (20), 5608-11.
- 284 8. Nagasawa, H.; Little, J. B., Induction of sister chromatid exchanges by extremely low doses of  
285 alpha-particles. *Cancer Res* **1992**, 52, (22), 6394-6.
- 286 9. Zhou, H.; Randers-Pehrson, G.; Waldren, C. A.; Vannais, D.; Hall, E. J.; Hei, T. K., Induction of a bystander  
287 mutagenic effect of alpha particles in mammalian cells. *Proc Natl Acad Sci U S A* **2000**, 97, (5), 2099-104.
- 288 10. Shao, C.; Lyng, F. M.; Folkard, M.; Prise, K. M., Calcium fluxes modulate the radiation-induced bystander  
289 responses in targeted glioma and fibroblast cells. *Radiat Res* **2006**, 166, (3), 479-87.
- 290 11. Chen, S.; Zhao, Y.; Han, W.; Zhao, G.; Zhu, L.; Wang, J.; Bao, L.; Jiang, E.; Xu, A.; Hei, T. K.; Yu, Z.; Wu, L.,  
291 Mitochondria-dependent signalling pathway are involved in the early process of radiation-induced  
292 bystander effects. *Br J Cancer* **2008**, 98, (11), 1839-44.
- 293 12. Tartier, L.; Gilchrist, S.; Burdak-Rothkamm, S.; Folkard, M.; Prise, K. M., Cytoplasmic irradiation induces  
294 mitochondrial-dependent 53BP1 protein relocalization in irradiated and bystander cells. *Cancer Res* **2007**,  
295 67, (12), 5872-9.
- 296 13. Zhou, H.; Ivanov, V. N.; Lien, Y. C.; Davidson, M.; Hei, T. K., Mitochondrial function and nuclear  
297 factor-kappaB-mediated signaling in radiation-induced bystander effects. *Cancer Res* **2008**, 68, (7), 2233-40.
- 298 14. Shao, C.; Stewart, V.; Folkard, M.; Michael, B. D.; Prise, K. M., Nitric oxide-mediated signaling in the  
299 bystander response of individually targeted glioma cells. *Cancer Res* **2003**, 63, (23), 8437-42.
- 300 15. Wang, R.; Coderre, J. A., A bystander effect in alpha-particle irradiations of human prostate tumor cells.  
301 *Radiat Res* **2005**, 164, (6), 711-22.
- 302 16. Shao, C.; Folkard, M.; Prise, K. M., Role of TGF-beta1 and nitric oxide in the bystander response of  
303 irradiated glioma cells. *Oncogene* **2008**, 27, (4), 434-40.
- 304 17. Gow, M. D.; Seymour, C. B.; Ryan, L. A.; Mothersill, C. E., Induction of bystander response in human  
305 glioma cells using high-energy electrons: a role for TGF-beta1. *Radiat Res* **2010**, 173, (6), 769-78.
- 306 18. Shao, C.; Furusawa, Y.; Aoki, M.; Ando, K., Role of gap junctional intercellular communication in  
307 radiation-induced bystander effects in human fibroblasts. *Radiat Res* **2003**, 160, (3), 318-23.
- 308 19. Azzam, E. I.; de Toledo, S. M.; Little, J. B., Direct evidence for the participation of gap junction-mediated  
309 intercellular communication in the transmission of damage signals from alpha -particle irradiated to  
310 nonirradiated cells. *Proc Natl Acad Sci U S A* **2001**, 98, (2), 473-8.
- 311 20. Thannickal, V. J.; Fanburg, B. L., Activation of an H2O2-generating NADH oxidase in human lung  
312 fibroblasts by transforming growth factor beta 1. *J Biol Chem* **1995**, 270, (51), 30334-8.

Cell-to-Cell Metabolic Cross-Talk in Physiology and Pathology(Cells 2020), 16–28 November 2020

- 313 21. Popp, H. D.; Naumann, N.; Brendel, S.; Henzler, T.; Weiss, C.; Hofmann, W. K.; Fabarius, A., Increase of  
314 DNA damage and alteration of the DNA damage response in myelodysplastic syndromes and acute  
315 myeloid leukemias. *Leuk Res* **2017**, *57*, 112-118.
- 316 22. Popp, H. D.; Brendel, S.; Hofmann, W. K.; Fabarius, A., Immunofluorescence Microscopy of gammaH2AX  
317 and 53BP1 for Analyzing the Formation and Repair of DNA Double-strand Breaks. *J Vis Exp* **2017**, (129).
- 318 23. Löffler, H.; Rastetter, J.; Haferlach, T. Light microscopic procedures. In *Atlas of Clinical Hematology*, 6th ed.;  
319 Springer: Heidelberg, Germany, 2005; p. 8.
- 320 24. McGowan-Jordan, J., Simons, A., Schmid, M., *ISCN 2016 An International System for Human Cytogenetic*  
321 *Nomenclature (2016)*. Karger: Basel, 2016.
- 322 25. Jacobs, P. A.; Brunton, M.; Court Brown, W. M.; Doll, R.; Goldstein, H., Change of human chromosome  
323 count distribution with age: evidence for a sex differences. *Nature* **1963**, *197*, 1080-1.
- 324 26. Pierre, R. V.; Hoagland, H. C., Age-associated aneuploidy: loss of Y chromosome from human bone  
325 marrow cells with aging. *Cancer* **1972**, *30*, (4), 889-94.
- 326 27. American Cancer Society. Oncogenes and tumor suppressor genes. Available online:  
327 <https://www.cancer.org/cancer/cancer-causes/genetics/genes-and-cancer/oncogenes-tumor-suppressor-genes.html>  
328 (accessed on 25 October 2020).
- 329 28. Tanaka, K.; Goto, H.; Nishimura, Y.; Kasahara, K.; Mizoguchi, A.; Inagaki, M., Tetraploidy in cancer and  
330 its possible link to aging. *Cancer Sci* **2018**, *109*, (9), 2632-2640.
- 331 29. Huang, L.; Wang, S. A.; DiNardo, C.; Li, S.; Hu, S.; Xu, J.; Zhou, W.; Goswami, M.; Medeiros, L. J.; Tang, G.,  
332 Tetraploidy/near-tetraploidy acute myeloid leukemia. *Leuk Res* **2017**, *53*, 20-27.
- 333

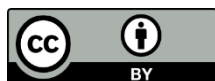

© 2020 by the authors; licensee MDPI, Basel, Switzerland. This article is an open access article distributed under the terms and conditions of the Creative Commons by Attribution (CC-BY) license (<http://creativecommons.org/licenses/by/4.0/>).

334
